# Supplementary material for: NN bond cleavage in diazirines by a cyclic diborane(4) compound
Source: Royal Society of Chemistry journal article supplement (doi:10.1039/d4sc04980b), 2024-01-01
Supplement: d4sc04980b1.pdf [file d4sc04980b1.pdf]

# Electronic Supplementary Information

## N=N Bond Cleavage in Diazirines by a Cyclic Diborane(4) Compound

Minling Zhong,<sup>a</sup> Jie Zhang<sup>b</sup> and Zuowei Xie<sup>\*a</sup>

<sup>a</sup> Shenzhen Grubbs Institute and Department of Chemistry, Southern University of Science and Technology, Shenzhen 518055, China.

<sup>b</sup> Department of Chemistry and State Key Laboratory of Synthetic Chemistry, The Chinese University of Hong Kong, Shatin, N. T., Hong Kong, China.

Email: Z. Xie, [zxie@cuhk.edu.hk](mailto:zxie@cuhk.edu.hk)

### Table of Contents

|                       |     |
|-----------------------|-----|
| Experimental Section  | S2  |
| Crystal Data          | S5  |
| Computational Details | S6  |
| NMR spectra           | S17 |
| References            | S32 |

## Experimental Section

**General Procedure.** All reactions were carried out under a dry argon atmosphere with the rigid exclusion of air and moisture using standard Schlenk line and glovebox techniques. All organic solvents were dried and distilled by standard methods prior to use. NMR spectra were acquired on a Bruker DPX 500 NMR spectrometer ( $^1\text{H}$ : 500 MHz,  $^{11}\text{B}$ : 160 MHz,  $^{13}\text{C}\{^1\text{H}\}$ : 125 MHz,  $^{19}\text{F}$ : 470 MHz,  $^{31}\text{P}$ : 202 MHz) or on a Bruker DPX 400 NMR spectrometer ( $^1\text{H}$ : 400 MHz,  $^{13}\text{C}\{^1\text{H}\}$ : 100 MHz) at 298 K. All chemical shifts were reported in  $\delta$  unit with references to the residual solvent resonances of the deuterated solvents for proton and carbon chemical shifts, to external  $\text{BF}_3\cdot\text{OEt}_2$  (0.00 ppm) for boron chemical shifts, to external  $\text{CFCl}_3$  (0.00 ppm) for fluorine chemical shifts, to external 85%  $\text{H}_3\text{PO}_4$  (0.00 ppm) for phosphorus chemical shifts. The data were reported as follows: chemical shift, multiplicity (s = singlet, d = doublet, t = triplet, q = quadruplet, sept = septet, m = multiplet or unresolved, br = broad), coupling constant, integration, and assignment. Mass spectra were obtained on a Bruker Solarix 9.4T ICR Mass Spectrometer or a Thermo Scientific Q Exactive Focus Orbitrap Mass Spectrometer. Carborane-fused diboracycle **1** was prepared according to literature procedures.<sup>1</sup> All other chemicals were purchased from either Aldrich, J&K, TCI or Acros Chemical Co. and used as received unless otherwise specified.

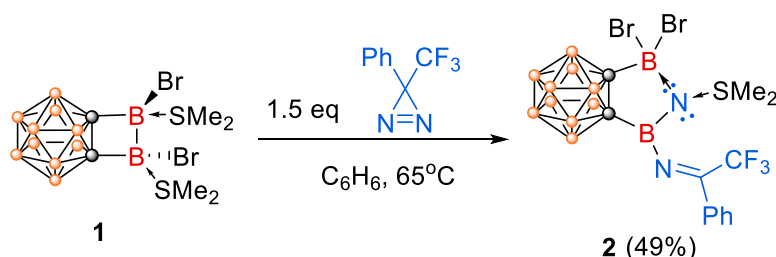

**Synthesis of 2.** To a benzene solution (6 mL) of 1,2-[ $\text{B}_2\text{Br}_2(\text{SMe}_2)_2$ ]-1,2- $\text{C}_2\text{B}_{10}\text{H}_{10}$  (**1**; 90 mg, 0.2 mmol) was added a benzene solution (5 mL) of 3-phenyl-3-(trifluoromethyl)-3H-diazirine (TPD) (56 mg, 0.3 mmol) at room temperature. The reaction mixture was heated at 65 °C overnight. The reaction mixture was allowed to slowly cool down to room temperature, from which colorless block shaped crystals of **2** were obtained. After removal of volatiles in vacuo, the residue was washed by cold toluene (2 mL) and then dissolved in DCM. The resulting solution was stored in a freezer at -30 °C overnight to give **2** as colorless crystals suitable for X-ray analyses (57 mg, 49%).

**$^1\text{H}$  NMR** (500 MHz,  $\text{CD}_2\text{Cl}_2$ ):  $\delta$  7.91 (d,  $^3J_{\text{HH}} = 8.3$  Hz, 2H), 7.75 (t,  $^3J_{\text{HH}} = 7.5$  Hz, 1H), 7.63 (t,  $^3J_{\text{HH}} = 7.8$  Hz, 2H) (phenyl *H*), 2.99 (s, 3H), 2.94 ppm (s, 3H) ( $\text{S}(\text{CH}_3)_2$ ).

**$^{13}\text{C}\{^1\text{H}\}$  NMR** (125 MHz,  $\text{CD}_2\text{Cl}_2$ ):  $\delta$  154.35 (q,  $^2J_{\text{CF}} = 33.9$  Hz,  $\text{N}=\text{C}-\text{CF}_3$ ), 135.63, 130.21, 129.80, 129.79, 128.82 (aromatic C), 118.21 (q,  $^1J_{\text{CF}} = 285.8$  Hz,  $\text{CF}_3$ ), 31.38, 30.87 ( $\text{N}(\text{CH}_3)_2$ ).

**$^{11}\text{B}$  NMR** (128 MHz,  $\text{CD}_2\text{Cl}_2$ ):  $\delta$  29.13 (s, 1B, *exo-B*), -0.25 (s, 1B, *exo-B*), -1.73 (d,  $^1J_{\text{BH}} = 157.6$  Hz, 1B, cage B), -2.98 (d,  $^1J_{\text{BH}} = 148.3$  Hz, 1B, cage B), -6.12 (d,  $^1J_{\text{BH}} = 148.0$  Hz, 2B, cage B), -9.84 to -11.90 ppm (m, 6B, cage B).

**$^{19}\text{F}$  NMR** (470 MHz,  $\text{CD}_2\text{Cl}_2$ ):  $\delta$  -66.65 (s, 3F).

**HRMS** (ESI-MS) calc. for  $\text{C}_{12}\text{H}_{21}\text{B}_{12}\text{Br}_2\text{F}_3\text{N}_2\text{S}$   $[\text{M}+\text{H}]^+$ : 571.31509. Found: 571.31675.

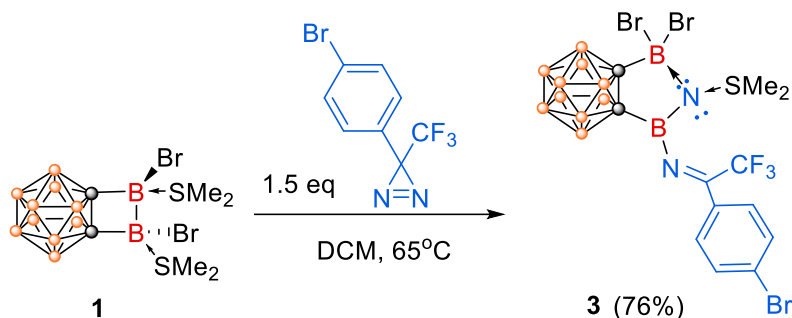

**Synthesis of 3.** To a dichloromethane (DCM) solution (6 mL) of 1,2-[B<sub>2</sub>Br<sub>2</sub>(SMe<sub>2</sub>)<sub>2</sub>]-1,2-C<sub>2</sub>B<sub>10</sub>H<sub>10</sub> (**1**; 67 mg, 0.15 mmol) was added a DCM solution (5 mL) of 3-(4-bromophenyl)-3-(trifluoromethyl)-3H-diazirine (60 mg, 0.23 mmol) at room temperature. The reaction mixture was heated at 65 °C overnight. The reaction mixture was allowed to slowly cool down to room temperature. After removal of volatiles in vacuo, the residue was washed by cold ether (2 mL) and then dissolved in DCM. The light-pink solution was stored in a freezer at -30 °C overnight to afford **3** as a white solid (75 mg, 76%).

<sup>1</sup>H NMR (500 MHz, CD<sub>2</sub>Cl<sub>2</sub>): δ 7.78 (s, 4H, aromatic *H*), 2.99 (s, 3H, S(CH<sub>3</sub>)<sub>2</sub>), 2.96 ppm (s, 3H, S(CH<sub>3</sub>)<sub>2</sub>).

<sup>13</sup>C{<sup>1</sup>H} NMR (100 MHz, CD<sub>2</sub>Cl<sub>2</sub>): δ 153.65 (m, <sup>2</sup>J<sub>CF</sub> = 35.3 Hz, N=C-CF<sub>3</sub>), 133.70, 131.34, 131.11, 127.92 (aromatic C), 118.16 (m, <sup>1</sup>J<sub>CF</sub> = 285.9 Hz, CF<sub>3</sub>), 32.09, 31.52 ppm (N(CH<sub>3</sub>)<sub>2</sub>).

<sup>11</sup>B NMR (128 MHz, CD<sub>2</sub>Cl<sub>2</sub>): δ 29.63 (s, 1B, *exo*-B), -0.44 (s, 1B, *exo*-B), -1.75 (d, <sup>1</sup>J<sub>BH</sub> = 150.4 Hz, 1B, cage B), -3.08 (d, <sup>1</sup>J<sub>BH</sub> = 168.8 Hz, 1B, cage B), -6.28 (d, <sup>1</sup>J<sub>BH</sub> = 146.4 Hz, 2B, cage B), -10.06 to -12.18 ppm (m, 6B, cage B).

<sup>19</sup>F NMR (470 MHz, CD<sub>2</sub>Cl<sub>2</sub>): δ -66.81 (s, 3F).

HRMS (APCI-positive mode) calc. for C<sub>12</sub>H<sub>20</sub>B<sub>12</sub>Br<sub>3</sub>F<sub>3</sub>N<sub>2</sub>S [M-Br]<sup>+</sup>: 571.08389. Found: 571.08159.

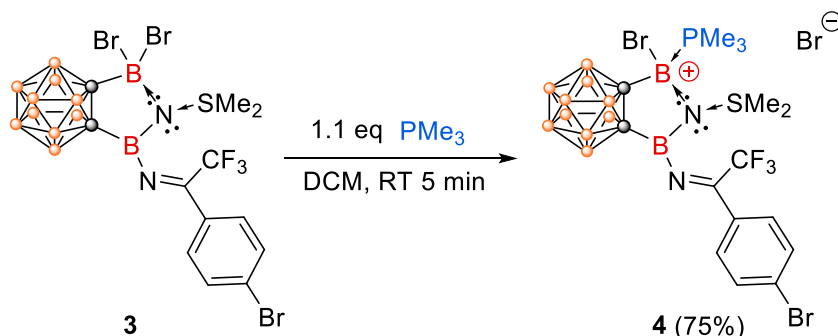

**Synthesis of 4.** To a DCM solution (6 mL) of **3** (65 mg, 0.1 mmol) was added a toluene solution (0.11 mL) of trimethylphosphine (9 mg, 0.11 mmol) at room temperature and the mixture was stirred at room temperature for 5 minutes. The resultant solution was then filtered and concentrated to *ca.* 1 mL. This solution was kept in a freezer at -30 °C overnight to give **4** as colorless crystals (55 mg, 75%).

<sup>1</sup>H NMR (400 MHz, CD<sub>2</sub>Cl<sub>2</sub>): δ 7.79 (s, 4H, aromatic *H*), 3.62 (brs, 3H, S(CH<sub>3</sub>)<sub>2</sub>), 3.28 (s, 3H, S(CH<sub>3</sub>)<sub>2</sub>), 1.94 ppm (d, <sup>2</sup>J<sub>PH</sub> = 11.9 Hz, 9H, P(CH<sub>3</sub>)<sub>3</sub>).

<sup>11</sup>B NMR (128 MHz, CD<sub>2</sub>Cl<sub>2</sub>): 31.82 (brs, 1B, *exo*-B), -0.98 (br, m, 3B, cage B), -5.99 (br, m, 3B, cage B), -10.78 ppm (br, m, 3B, cage B), the signal of the *exo*-sp<sup>3</sup>B falls in the range of those of cage Bs.

<sup>19</sup>F NMR (470 MHz, CD<sub>2</sub>Cl<sub>2</sub>): δ -66.80 (s, 3F, CF<sub>3</sub>).

<sup>31</sup>P NMR (162 MHz, CD<sub>2</sub>Cl<sub>2</sub>): δ -12.73 ppm (m, P(CH<sub>3</sub>)<sub>3</sub>).

Noted that it was not feasible to take the <sup>13</sup>C NMR spectrum, HRMS and elemental analyses since **4** was thermally unstable.

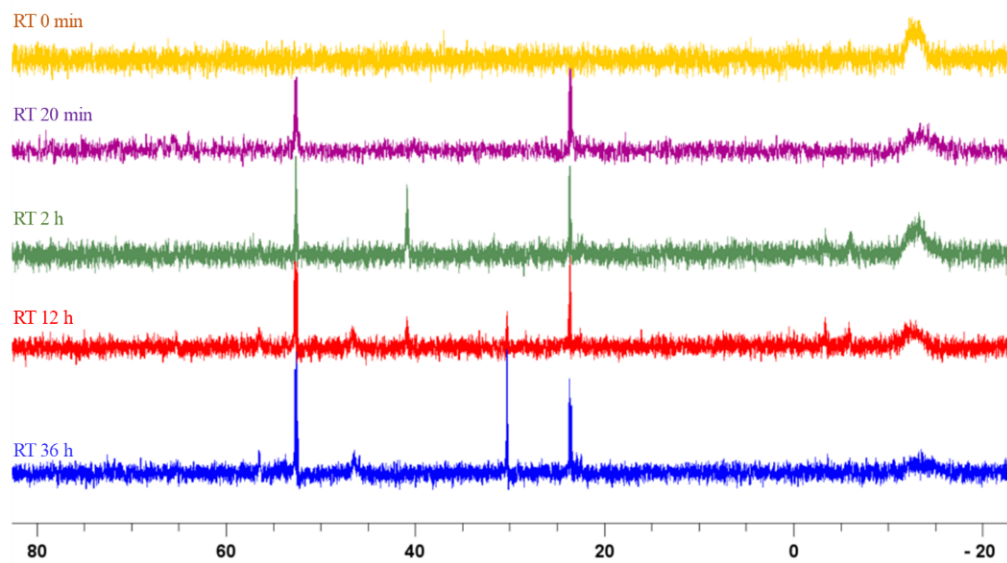

**Figure S1.** Time dependent  $^{31}\text{P}$  NMR spectra of **4** in  $\text{CD}_2\text{Cl}_2$ .

## Crystal Data

**X-ray Structure Determination.** Single crystals were immersed in Paraton-*N* oil and were sealed under argon in thin-walled glass capillaries. The data were collected at 297 K (for **2**) or 245 K (for **4**) on a Bruker D8 Venture X-Ray Diffractometer using Mo-K $\alpha$  radiation. An empirical absorption correction was applied using the SADABS program.<sup>2</sup> All structures were solved by direct methods and subsequent Fourier difference techniques and refined anisotropically for all non-hydrogen atoms by full-matrix least squares calculations on  $F^2$  using the SHELXTL program package.<sup>3</sup> All hydrogen atoms were geometrically fixed using the riding model. Crystal data and details of data collection and refinement are given in Table S1.

Details of the crystal structures were deposited in the Cambridge Crystallographic Data Centre with CCDC 2324682 for **2** and 2324683 for **4**.

**Table S1.** Crystal Data and Summary of Data Collection and Refinement.

| Compound                             | <b>2</b> ·C <sub>6</sub> H <sub>6</sub>                                                         | <b>4</b> ·1.5CH <sub>2</sub> Cl <sub>2</sub>                                                                      |
|--------------------------------------|-------------------------------------------------------------------------------------------------|-------------------------------------------------------------------------------------------------------------------|
| Formula                              | C <sub>18</sub> H <sub>27</sub> B <sub>12</sub> Br <sub>2</sub> F <sub>3</sub> N <sub>2</sub> S | C <sub>16.5</sub> H <sub>32</sub> B <sub>12</sub> Br <sub>3</sub> F <sub>3</sub> N <sub>2</sub> PSCl <sub>3</sub> |
| M <sub>w</sub>                       | 650.01                                                                                          | 854.27                                                                                                            |
| Crystal size (mm <sup>3</sup> )      | 0.50 x 0.40 x 0.30                                                                              | 0.40 x 0.30 x 0.20                                                                                                |
| Crystal system                       | Orthorhombic                                                                                    | Monoclinic                                                                                                        |
| Space Group                          | Pbca                                                                                            | C2/c                                                                                                              |
| a, Å                                 | 10.0967(4)                                                                                      | 16.7138(19)                                                                                                       |
| b, Å                                 | 23.8308(10)                                                                                     | 35.995(4)                                                                                                         |
| c, Å                                 | 24.3101(11)                                                                                     | 13.3816(16)                                                                                                       |
| $\beta$ , deg                        | 90                                                                                              | 118.474(3)                                                                                                        |
| V, Å <sup>3</sup>                    | 5849.3(4)                                                                                       | 7076.6(15)                                                                                                        |
| Z                                    | 8                                                                                               | 8                                                                                                                 |
| $D_{\text{calcd}}$ Mg/m <sup>3</sup> | 1.476                                                                                           | 1.604                                                                                                             |
| Radiation (Å)                        | 0.71073                                                                                         | 0.71073                                                                                                           |
| 2 $\theta$ range, deg                | 5.244 to 50.498                                                                                 | 4.696 to 50.500                                                                                                   |
| $\mu$ , mm <sup>-1</sup>             | 2.876                                                                                           | 3.782                                                                                                             |
| F(000)                               | 528                                                                                             | 3352                                                                                                              |
| No. of obsd reflns                   | 5294                                                                                            | 6398                                                                                                              |
| No. of params refnd                  | 343                                                                                             | 368                                                                                                               |
| Goodness of fit                      | 1.058                                                                                           | 1.044                                                                                                             |
| R1                                   | 0.0553                                                                                          | 0.0840                                                                                                            |
| wR2                                  | 0.1190                                                                                          | 0.2148                                                                                                            |

## Computational Details

Geometry optimizations were carried out with the Gaussian16 program, Revision C.01<sup>4</sup> at the M06-2X<sup>5</sup>-D3<sup>6-7</sup>/6-311G(d,p) level of density functional theory. Frequency calculations were made to determine the characteristics of all stationary points as energy minimum or transition states and obtain thermal corrections. Intrinsic reaction coordinates (IRC)<sup>8-9</sup> were calculated to confirm that transition states lead to relevant intermediates. The solvent effect of benzene was taken into consideration by performing single-point solvation energy calculations with the conductor-like polarizable continuum model (CPCM)<sup>10-13</sup> using UAKS radii. The natural bond orbital (NBO)<sup>14</sup> calculations were performed at the B3LYP<sup>15-16+</sup>-D3<sup>6-7</sup>/6-311+G(d,p) level of density functional theory.

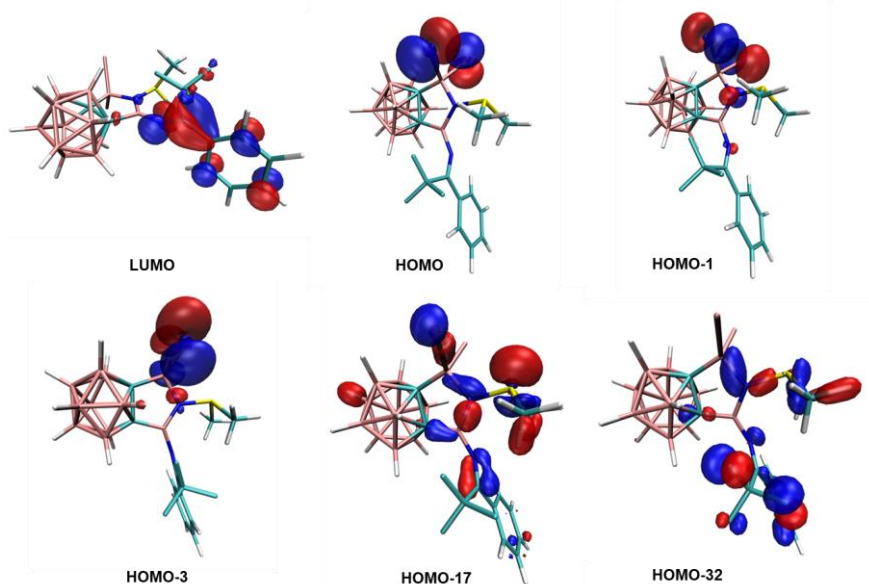

**Figure S2.** Plots of selected molecular orbitals of **2** calculated at the B3LYP-D3/6-311+G(d,p) level of theory (isovalue 0.04 a. u.).

**Table S2.** Occupancy of lone-pairs of **2** at the B3LYP-D3/6-311+G(d,p) level of theory.

| LP                | Occupancy | %p    | %s    |
|-------------------|-----------|-------|-------|
| LP S1             | 1.96      | 51.72 | 48.27 |
| LP( $\sigma$ ) N1 | 1.74      | 99.94 | 0.04  |
| LP( $\pi$ ) N1    | 1.68      | 96.80 | 3.19  |

**Table S3.** Hyperconjugation stabilization energy calculated for **2** at the B3LYP-D3/6-311+G(d,p) level of theory.

| donor NBOs        | acceptor NBOs | $E^{(2)}_{ij}$ / kcal mol <sup>-1</sup> |
|-------------------|---------------|-----------------------------------------|
| LP( $\sigma$ ) N1 | LP* B13       | 175.45                                  |
| BD B14–N1         | LP* B13       | 134.11                                  |
| LP( $\pi$ ) N1    | LP* B14       | 52.80                                   |
| LP( $\sigma$ ) N1 | BD* B14–N1    | 34.97                                   |
| BD S1–N1          | LP* B13       | 18.69                                   |
| LP S1             | BD* B14–N1    | 5.69                                    |

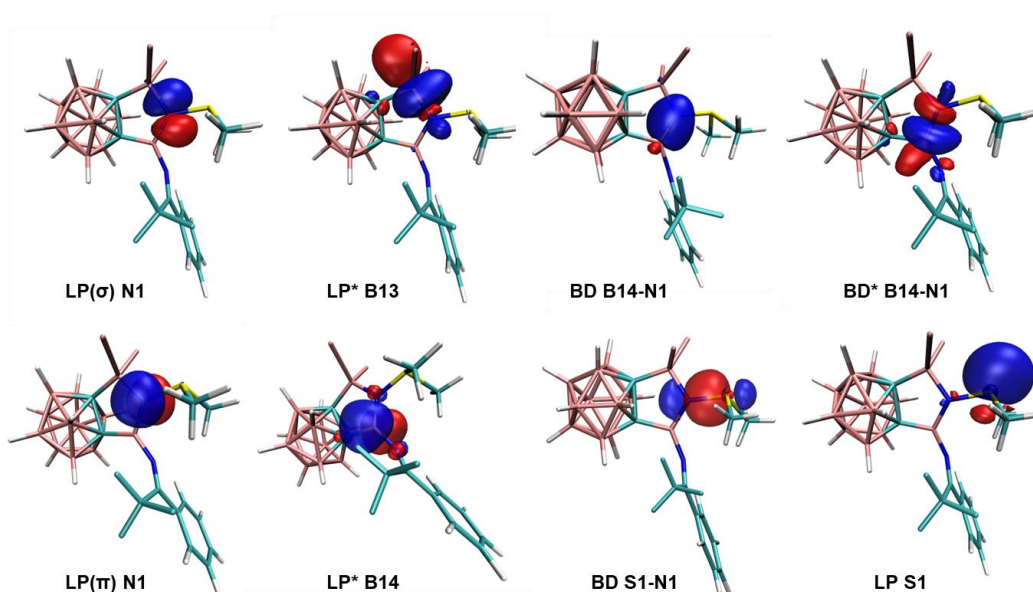

**Figure S3.** Plots of selected natural bond orbitals of **2** at the B3LYP-D3/6-311+G(d,p) level of theory (isovalue 0.04 a. u.).

**Cartesian coordinates:**

|          |             |             |             |                        |             |             |             |
|----------|-------------|-------------|-------------|------------------------|-------------|-------------|-------------|
| <b>1</b> |             |             |             | B                      | -2.57756600 | -1.46519500 | 0.84467500  |
| Br       | 1.21419200  | 1.80815500  | 1.66740000  | H                      | -2.43235500 | -2.47687200 | 1.44049900  |
| C        | -1.26727900 | 0.82376200  | 0.02639200  | B                      | -2.57778300 | -1.42940000 | -0.91779400 |
| B        | -2.57967300 | 1.46059700  | -0.84603300 | H                      | -2.42367500 | -2.41169500 | -1.55347100 |
| H        | -2.43714600 | 2.47248000  | -1.44192800 | B                      | -1.72541100 | 0.02833700  | -1.42404300 |
| B        | -2.58195600 | 1.42552300  | 0.91659800  | H                      | -0.98843600 | 0.04702500  | -2.33786600 |
| H        | -2.43078900 | 2.40835400  | 1.55222400  | B                      | -4.01408900 | -0.89515800 | -0.02238500 |
| B        | -1.72806700 | -0.03106800 | 1.42426300  | H                      | -5.01156000 | -1.52884300 | -0.03863200 |
| H        | -0.99289500 | -0.04649400 | 2.33977100  | B                      | -3.46779400 | 0.02951100  | -1.43555500 |
| B        | -4.01691400 | 0.88786400  | 0.01919400  | H                      | -4.04217400 | 0.05582100  | -2.46761900 |
| H        | -5.01620200 | 1.51859300  | 0.03322000  | B                      | 0.37454100  | -0.87738500 | -0.05820100 |
| B        | -3.47019200 | -0.03607700 | 1.43409600  | S                      | 1.03466700  | 1.74910700  | -1.57356400 |
| H        | -4.04647300 | -0.06440300 | 2.46496200  | C                      | 2.82873500  | 1.62304700  | -1.41088800 |
| B        | 0.37297700  | 0.87711600  | 0.06133000  | H                      | 3.06645500  | 0.56207500  | -1.48474700 |
| Br       | 1.21909300  | -1.80235200 | -1.66651000 | H                      | 3.28657700  | 2.16497600  | -2.23677500 |
| S        | 1.03682000  | -1.75052200 | 1.57400000  | H                      | 3.13890300  | 2.02738600  | -0.44853400 |
| C        | -1.26546600 | -0.82650900 | -0.02534100 | C                      | 0.78033900  | 3.51538600  | -1.27731800 |
| C        | 2.83115000  | -1.62205000 | 1.41089500  | H                      | -0.29688900 | 3.66574000  | -1.21151400 |
| H        | 3.06859400  | -0.56083600 | 1.47995600  | H                      | 1.25738600  | 3.80583600  | -0.34294600 |
| H        | 3.28894700  | -2.16080600 | 2.23882400  | H                      | 1.18332300  | 4.06817500  | -2.12431300 |
| H        | 3.14087900  | -2.02949900 | 0.44966400  |                        |             |             |             |
| C        | 0.78740800  | -3.51756300 | 1.27573700  | <b>SMe<sub>2</sub></b> |             |             |             |
| H        | -0.28893000 | -3.66998700 | 1.20022300  | S                      | 0.00000000  | 0.66585500  | -0.00000800 |
| H        | 1.27461000  | -3.80793300 | 0.34642800  | C                      | -1.37218000 | -0.51691100 | 0.00000100  |
| H        | 1.18339100  | -4.06931200 | 2.12685700  | H                      | -2.29632700 | 0.05948100  | -0.00005000 |

|                  |             |             |             |            |             |             |             |
|------------------|-------------|-------------|-------------|------------|-------------|-------------|-------------|
| H                | -1.34632700 | -1.14246600 | -0.89292100 | H          | 0.93634500  | -3.21681400 | 1.41529400  |
| H                | -1.34637700 | -1.14238800 | 0.89298000  | H          | 2.42909700  | -2.92518000 | 0.47588900  |
| C                | 1.37218000  | -0.51691100 | 0.00001000  | H          | 2.49941000  | -3.09486200 | 2.27001400  |
| H                | 2.29632700  | 0.05948000  | -0.00002800 | C          | 3.30120400  | -0.31179100 | 1.39551900  |
| H                | 1.34636800  | -1.14239200 | 0.89298500  | H          | 3.20901800  | 0.77356300  | 1.36388000  |
| H                | 1.34633600  | -1.14246100 | -0.89291500 | H          | 3.90632400  | -0.61171600 | 2.24922500  |
| <b>Diazirine</b> |             |             |             | H          | 3.71372000  | -0.68100300 | 0.45812100  |
| F                | 2.99636500  | 0.07748500  | 0.00002800  | B          | -1.93086900 | -1.65567500 | 1.04533900  |
| F                | 1.68596700  | -1.25693200 | -1.07730900 | H          | -1.49695100 | -2.51883100 | 1.72757000  |
| F                | 1.68593100  | -1.25692000 | 1.07733900  | B          | -1.98407800 | -1.81017300 | -0.71467200 |
| C                | 0.71493300  | 0.59648600  | -0.00001000 | H          | -1.58639900 | -2.77969100 | -1.25658100 |
| C                | 1.78104300  | -0.46828700 | 0.00001200  | B          | -1.56641400 | -0.23123900 | -1.40867700 |
| C                | -0.71983600 | 0.21589800  | -0.00000800 | H          | -0.87019000 | -0.08717300 | -2.34474500 |
| C                | -1.12508500 | -1.12150400 | -0.00003800 | B          | -3.48683400 | -1.58699700 | 0.20335800  |
| H                | -0.39607000 | -1.92053000 | -0.00006600 | H          | -4.27448600 | -2.46146400 | 0.30433400  |
| C                | -2.47658300 | -1.43898000 | -0.00003300 | B          | -3.24914600 | -0.70408200 | -1.32398300 |
| H                | -2.77785900 | -2.47948900 | -0.00005600 | H          | -3.83844900 | -0.94947300 | -2.31691300 |
| C                | -3.43786300 | -0.43471300 | 0.00000100  | B          | 0.72903400  | -0.42609000 | -0.03264000 |
| H                | -4.49093500 | -0.68835000 | 0.00000500  | Br         | 0.90411700  | 2.97146300  | 0.03525400  |
| C                | -3.03951500 | 0.89612500  | 0.00003000  | <b>TS1</b> |             |             |             |
| H                | -3.77922400 | 1.68726700  | 0.00005800  | Br         | 1.58499100  | -0.66567900 | 1.84664100  |
| C                | -1.68927200 | 1.22192900  | 0.00002500  | C          | -1.00987700 | -0.80051100 | -0.01170100 |
| H                | -1.39406700 | 2.26396900  | 0.00004900  | B          | -2.33784600 | -1.63344600 | 0.62345200  |
| N                | 1.10548600  | 1.87591700  | 0.60601800  | H          | -2.17329300 | -2.70584600 | 1.08286000  |
| N                | 1.10549100  | 1.87589900  | -0.60607300 | B          | -2.19191700 | -1.34220900 | -1.11219100 |
| <b>A</b>         |             |             |             | H          | -1.90252200 | -2.20629000 | -1.85935600 |
| Br               | 1.77407400  | -1.10877300 | -1.61011200 | B          | -1.42065800 | 0.22872800  | -1.32767000 |
| C                | -1.33557900 | 0.79781900  | -0.06973800 | H          | -0.58054300 | 0.43699900  | -2.13403300 |
| B                | -2.78775400 | 0.97067200  | -0.92597800 | B          | -3.73635100 | -1.03409100 | -0.30102600 |
| H                | -2.92825100 | 1.91494100  | -1.61712700 | H          | -4.67916800 | -1.71799400 | -0.49687700 |
| B                | -2.73796800 | 1.12289900  | 0.83199100  | B          | -3.14547000 | 0.12084100  | -1.51765600 |
| H                | -2.83275800 | 2.17258100  | 1.36066700  | H          | -3.62204700 | 0.25929300  | -2.58923000 |
| B                | -1.48756300 | 0.01606700  | 1.42864800  | B          | 0.65139700  | -0.69930700 | -0.05470700 |
| H                | -0.73406500 | 0.31796200  | 2.28494900  | C          | -1.16442500 | 0.83508700  | 0.25621000  |
| B                | -3.98127500 | 0.11963200  | 0.07191600  | B          | -2.44231200 | 1.50772300  | -0.64995500 |
| H                | -5.11557800 | 0.44772300  | 0.07753200  | H          | -2.32022500 | 2.60143300  | -1.08077400 |
| B                | -3.16282900 | -0.45728100 | 1.54232300  | B          | -2.58930400 | 1.22018600  | 1.08680200  |
| H                | -3.68013200 | -0.52696800 | 2.60158900  | H          | -2.57793500 | 2.11370300  | 1.85749500  |
| B                | 0.19053300  | 1.21597800  | -0.04707800 | B          | -1.66140900 | -0.24481100 | 1.48324800  |
| S                | 1.63286600  | -0.96846000 | 1.62230900  | H          | -1.02871900 | -0.32639200 | 2.46348900  |
| C                | -0.87056700 | -0.79939700 | 0.04753800  | B          | -3.88930200 | 0.71819600  | -0.01569300 |
| C                | 1.91771700  | -2.74345200 | 1.41945800  | H          | -4.93143700 | 1.27456500  | -0.01080900 |
|                  |             |             |             | B          | -3.39350700 | -0.35707900 | 1.30535400  |



|          |             |             |             |          |             |             |             |
|----------|-------------|-------------|-------------|----------|-------------|-------------|-------------|
| H        | -4.05998100 | -0.56373000 | 2.25777800  | H        | 0.01803800  | 3.60772500  | 0.29739300  |
| B        | 0.41630600  | 0.92335600  | 0.18225000  | C        | -3.01905700 | 1.75999600  | -0.98501400 |
| Br       | 1.65323800  | -1.71722700 | -1.40658600 | H        | -3.70489700 | 2.58951800  | -1.14539800 |
| S        | 1.49904900  | 2.46820700  | 0.17550300  | H        | -3.17599700 | 0.98137900  | -1.73065900 |
| C        | 0.62843400  | 3.43453500  | -1.09592000 | H        | -3.10183100 | 1.33502300  | 0.01466900  |
| H        | 1.27494100  | 4.26201500  | -1.38146600 |          |             |             |             |
| H        | 0.39368000  | 2.80016800  | -1.94968500 | <b>C</b> |             |             |             |
| H        | -0.28656500 | 3.80737500  | -0.63953800 | Br       | -0.50979600 | -1.94684100 | -1.41411600 |
| C        | 2.92768200  | 1.82436000  | -0.74129500 | C        | 1.59629000  | 0.30517300  | -1.23407400 |
| H        | 3.63327900  | 2.63877300  | -0.89294400 | B        | 1.33938100  | 1.15156200  | -2.68873600 |
| H        | 3.36044000  | 1.04640000  | -0.11227900 | H        | 0.87723100  | 0.57100900  | -3.60411000 |
| H        | 2.58829200  | 1.38868100  | -1.67940700 | B        | 2.96843300  | 0.80494300  | -2.10785800 |
| <b>B</b> |             |             |             | H        | 3.64274200  | -0.01571500 | -2.61843700 |
| Br       | -1.49104900 | -2.07311100 | -1.04284000 | B        | 2.93551100  | 0.86798400  | -0.34901100 |
| C        | 1.00125600  | -0.66363100 | 0.25986900  | H        | 3.52567900  | 0.10370900  | 0.30915000  |
| B        | 2.29780900  | -1.69499400 | -0.07843100 | B        | 2.56665100  | 2.43467700  | -2.68072300 |
| H        | 2.08608900  | -2.84998900 | -0.17377800 | H        | 3.01817600  | 2.85667600  | -3.68726000 |
| B        | 2.16461800  | -0.85445800 | 1.47056900  | B        | 3.55506100  | 2.24081700  | -1.21793100 |
| H        | 1.86283500  | -1.41952600 | 2.45925800  | H        | 4.70798300  | 2.49134600  | -1.16090900 |
| B        | 1.44400000  | 0.73264600  | 1.16869500  | B        | 1.02553900  | -1.05570100 | -0.52104800 |
| H        | 0.64215200  | 1.24069300  | 1.86354300  | C        | 1.32866200  | 1.26649500  | 0.06541600  |
| B        | 3.71498900  | -0.87708600 | 0.60456500  | B        | 2.50178900  | 2.48941700  | 0.19883500  |
| H        | 4.63647900  | -1.49032400 | 1.01646500  | H        | 2.84382300  | 2.82978700  | 1.27898900  |
| B        | 3.17420200  | 0.62830000  | 1.38346000  | B        | 0.87612100  | 2.84617400  | -0.38795500 |
| H        | 3.66777300  | 1.08323700  | 2.35479600  | H        | 0.10898800  | 3.42777200  | 0.29247600  |
| B        | -0.66193600 | -0.62668500 | 0.06990100  | B        | 0.31073300  | 1.43352900  | -1.28993100 |
| C        | 1.21997300  | 0.80751000  | -0.51666900 | H        | -0.78146800 | 1.01073600  | -1.22154400 |
| B        | 2.51775000  | 1.69124200  | 0.11759800  | B        | 2.28115200  | 3.47538800  | -1.26066500 |
| H        | 2.42826000  | 2.86950700  | 0.16937200  | H        | 2.53037500  | 4.63007700  | -1.25383600 |
| B        | 2.64604400  | 0.85219000  | -1.43290600 | B        | 0.90819700  | 2.81066100  | -2.16852000 |
| H        | 2.64054500  | 1.44860000  | -2.45103300 | H        | 0.15568200  | 3.46843900  | -2.79822900 |
| B        | 1.64775500  | -0.62628900 | -1.33277900 | B        | 0.66516600  | 0.12684900  | 0.98137800  |
| H        | 0.96676000  | -0.98001300 | -2.22471400 | Br       | 2.42129100  | -2.45128900 | -0.06243800 |
| B        | 3.93028100  | 0.68490600  | -0.22556100 | S        | 1.33290100  | -0.15553100 | 2.81598400  |
| H        | 4.99206000  | 1.17163800  | -0.40023000 | C        | 3.13667800  | -0.27940300 | 2.82381400  |
| B        | 3.38204900  | -0.74066900 | -1.13972700 | H        | 3.41487000  | -0.48711900 | 3.85659600  |
| H        | 4.02754800  | -1.26552500 | -1.97713800 | H        | 3.46198700  | -1.06883300 | 2.15075900  |
| B        | -0.32802900 | 0.86389500  | -0.67323900 | H        | 3.53064300  | 0.68729900  | 2.51788600  |
| Br       | -1.72078600 | -0.35343200 | 1.79821200  | C        | 0.86463200  | -1.87208500 | 3.17195600  |
| S        | -1.32666400 | 2.36984500  | -1.23465500 | H        | 1.30760800  | -2.13614700 | 4.13125100  |
| C        | -1.04071700 | 3.35106700  | 0.27996600  | H        | -0.22063000 | -1.89573000 | 3.24786600  |
| H        | -1.65261900 | 4.24789600  | 0.20732800  | H        | 1.21895800  | -2.51984300 | 2.37272800  |
| H        | -1.30873200 | 2.74701900  | 1.14698500  | F        | -1.65186400 | 2.58668200  | 2.19168200  |
|          |             |             |             | F        | -3.72731000 | 2.16106400  | 1.77202000  |

|            |             |             |             |          |             |             |             |
|------------|-------------|-------------|-------------|----------|-------------|-------------|-------------|
| F          | -2.42068000 | 2.82374200  | 0.19018700  | S        | 1.32518700  | 0.08647900  | 2.86844600  |
| C          | -2.15718700 | 0.61421800  | 1.01230500  | C        | 3.12001000  | -0.13392400 | 2.87639200  |
| C          | -2.49017900 | 2.07662700  | 1.28993300  | H        | 3.39526900  | -0.28432300 | 3.91980000  |
| C          | -3.02174900 | -0.14103900 | 0.06297300  | H        | 3.40013800  | -0.98522100 | 2.26133300  |
| C          | -3.39716800 | 0.38909600  | -1.17140100 | H        | 3.56590400  | 0.78564600  | 2.50373700  |
| H          | -3.06104100 | 1.37024600  | -1.47772600 | C        | 0.77437000  | -1.57298100 | 3.35519400  |
| C          | -4.18773600 | -0.36680700 | -2.02656200 | H        | 1.18593100  | -1.77176400 | 4.34373900  |
| H          | -4.46347200 | 0.03622100  | -2.99284800 | H        | -0.31221100 | -1.54034500 | 3.40276500  |
| C          | -4.61381200 | -1.63620800 | -1.65150400 | H        | 1.11577800  | -2.30085200 | 2.62269200  |
| H          | -5.22438000 | -2.22322800 | -2.32691500 | F        | -1.66901300 | 2.80502500  | 1.99884500  |
| C          | -4.25688200 | -2.15336300 | -0.41158000 | F        | -3.72975700 | 2.34449000  | 1.54214600  |
| H          | -4.58857400 | -3.14023300 | -0.11468400 | F        | -2.35612600 | 2.84748700  | -0.04186500 |
| C          | -3.46005400 | -1.40741200 | 0.44396900  | C        | -2.14101200 | 0.72051500  | 1.00343100  |
| H          | -3.16187000 | -1.81491000 | 1.40272500  | C        | -2.47343200 | 2.20439700  | 1.12321300  |
| N          | -0.77995700 | 0.25812400  | 1.28103400  | C        | -2.98397500 | -0.11299500 | 0.09361700  |
| N          | -1.59018900 | -0.08743100 | 2.16811900  | C        | -3.37023100 | 0.32698600  | -1.17303000 |
|            |             |             |             | H        | -3.05984100 | 1.29506100  | -1.54166200 |
| <b>TS2</b> |             |             |             | C        | -4.14143800 | -0.49816400 | -1.98111200 |
| Br         | -0.53784800 | -2.00511200 | -1.39366400 | H        | -4.42659900 | -0.16074500 | -2.96967000 |
| C          | 1.60218800  | 0.18981500  | -1.23730300 | C        | -4.53905900 | -1.75157900 | -1.52957100 |
| B          | 1.38216400  | 0.93785500  | -2.74983800 | H        | -5.13779400 | -2.39178300 | -2.16639000 |
| H          | 0.91296000  | 0.30421100  | -3.62560300 | C        | -4.17103600 | -2.18122600 | -0.25967300 |
| B          | 2.99735100  | 0.58131400  | -2.13150800 | H        | -4.48316400 | -3.15422800 | 0.09875100  |
| H          | 3.64383100  | -0.29734900 | -2.57813100 | C        | -3.39400900 | -1.36407700 | 0.54923000  |
| B          | 2.95394300  | 0.76165500  | -0.37997100 | H        | -3.08988700 | -1.69801900 | 1.53387100  |
| H          | 3.51119000  | 0.02395100  | 0.33472000  | N        | -0.76976300 | 0.39727600  | 1.30680500  |
| B          | 2.65021800  | 2.17857900  | -2.81755500 | N        | -1.61556300 | 0.13225600  | 2.22683700  |
| H          | 3.12304200  | 2.51332600  | -3.84679500 |          |             |             |             |
| B          | 3.62035000  | 2.05381600  | -1.33446900 | <b>D</b> |             |             |             |
| H          | 4.78008600  | 2.27125300  | -1.28326400 | Br       | -0.67195000 | -1.84696100 | -2.16244900 |
| B          | 1.00486300  | -1.15172700 | -0.55321300 | S        | -1.61479000 | 1.76758300  | -2.31911100 |
| C          | 1.35321700  | 1.23279600  | -0.01159100 | C        | -1.58145900 | 0.42859000  | 0.53825100  |
| B          | 2.56206300  | 2.42690800  | 0.04956900  | C        | -3.35697500 | 1.31700500  | -2.49803600 |
| H          | 2.90191900  | 2.82995000  | 1.10838700  | H        | -3.39302900 | 0.26936900  | -2.78799000 |
| B          | 0.95394600  | 2.79471900  | -0.57673900 | H        | -3.90912000 | 1.48167200  | -1.57694200 |
| H          | 0.20030400  | 3.43897100  | 0.06008800  | H        | -3.74966000 | 1.93315400  | -3.30610900 |
| B          | 0.34611000  | 1.34451400  | -1.38444300 | C        | -1.72269700 | 3.55119400  | -1.98784800 |
| H          | -0.75670200 | 0.95690900  | -1.29362500 | H        | -0.70853000 | 3.84808200  | -1.70978500 |
| B          | 2.38556100  | 3.32034500  | -1.47457500 | H        | -2.03211200 | 4.05616600  | -2.90136100 |
| H          | 2.67174100  | 4.46431400  | -1.54084300 | H        | -2.42121500 | 3.72659800  | -1.17165300 |
| B          | 0.99861900  | 2.63993700  | -2.34923300 | B        | -3.13567000 | 0.85183800  | 1.07208200  |
| H          | 0.27434700  | 3.27536800  | -3.03189300 | H        | -3.68425300 | 1.73354400  | 0.50830500  |
| B          | 0.63530500  | 0.28418000  | 1.04783600  | B        | -1.71467500 | 1.19854400  | 2.05719300  |
| Br         | 2.29802300  | -2.50504800 | 0.13604100  | H        | -1.29700800 | 2.29768200  | 2.13069400  |

|          |             |             |             |    |             |             |             |
|----------|-------------|-------------|-------------|----|-------------|-------------|-------------|
| B        | -0.54852300 | -0.11250500 | 1.81111000  | B  | 3.24990700  | -1.40250100 | 0.83196400  |
| H        | 0.61092600  | 0.02780700  | 1.69052700  | H  | 3.06100500  | -2.42727800 | 1.37427200  |
| B        | -3.16755900 | 0.50488700  | 2.80406500  | B  | 2.46768300  | 0.03838500  | 1.47436900  |
| H        | -3.83903100 | 1.15115700  | 3.52898000  | H  | 1.71692100  | 0.06064500  | 2.37758100  |
| B        | -1.55817500 | -0.08494900 | 3.26386500  | B  | 4.71355800  | -0.89334000 | -0.02142000 |
| H        | -1.05965600 | 0.12394300  | 4.31261300  | H  | 5.66212700  | -1.59550000 | -0.06237700 |
| B        | -0.86835000 | 1.18971700  | -0.63757700 | B  | 4.22380100  | -0.05837700 | 1.46981400  |
| Br       | 1.06625800  | -3.01061200 | 0.33526900  | H  | 4.79922000  | -0.15372000 | 2.49630500  |
| C        | -1.32278800 | -1.20747300 | 0.75730700  | B  | 0.38485700  | -1.27186700 | 0.00797400  |
| B        | -1.28363600 | -1.60737200 | 2.41456600  | Br | 0.22949800  | -3.11661000 | 0.77479200  |
| H        | -0.56375300 | -2.47377900 | 2.75200500  | S  | 0.60173600  | 3.49648700  | -0.47752600 |
| B        | -2.69632700 | -1.96295800 | 1.41290800  | C  | 2.09844300  | 0.96667400  | 0.08355400  |
| H        | -2.93293000 | -3.06390900 | 1.06000200  | C  | -0.98768100 | 4.02104000  | 0.21490300  |
| B        | -2.85288400 | -0.66533300 | 0.21514600  | H  | -0.80976700 | 4.25018600  | 1.26455800  |
| H        | -3.15329000 | -0.87700600 | -0.89909200 | H  | -1.30198100 | 4.91827200  | -0.31525500 |
| B        | -2.89836400 | -1.23084600 | 3.01770200  | H  | -1.72643800 | 3.22910000  | 0.13100300  |
| H        | -3.36691100 | -1.85568800 | 3.90302400  | C  | 0.18967300  | 3.12804000  | -2.21441900 |
| B        | -3.87277000 | -0.64990800 | 1.64616900  | H  | 1.10979400  | 2.76209600  | -2.66981300 |
| H        | -5.03163100 | -0.84684000 | 1.53391100  | H  | -0.57926400 | 2.35670500  | -2.25617400 |
| B        | -0.37798200 | -1.95204600 | -0.27059000 | H  | -0.12610400 | 4.05601300  | -2.68801800 |
| F        | 0.89354000  | 3.90069500  | 0.84789800  | B  | 3.43943400  | 1.45472900  | 1.00322500  |
| F        | 2.99609200  | 3.44665700  | 1.05701500  | H  | 3.32541200  | 2.43665900  | 1.65238600  |
| F        | 1.52680500  | 2.34510300  | 2.19014300  | B  | 3.44559100  | 1.55267000  | -0.75771700 |
| C        | 1.69549100  | 1.91654800  | -0.15782900 | H  | 3.33350200  | 2.60626500  | -1.29188200 |
| C        | 1.77389000  | 2.91032800  | 0.99243800  | B  | 2.48036100  | 0.21902400  | -1.39748000 |
| C        | 2.63174600  | 0.73612300  | -0.13454700 | H  | 1.75754500  | 0.37346500  | -2.30873100 |
| C        | 3.36170900  | 0.34883000  | 0.98885700  | B  | 4.83823100  | 0.87261300  | 0.08571900  |
| H        | 3.27932100  | 0.89577500  | 1.91912300  | H  | 5.86571200  | 1.45473200  | 0.11837700  |
| C        | 4.21117300  | -0.75164800 | 0.91943900  | B  | 4.23070200  | 0.10720700  | -1.40179000 |
| H        | 4.77884900  | -1.04194500 | 1.79543300  | H  | 4.80712300  | 0.13616600  | -2.43222700 |
| C        | 4.33661500  | -1.47037600 | -0.26291600 | B  | 0.72309100  | 1.69329600  | 0.14047600  |
| H        | 5.00074500  | -2.32527900 | -0.31113200 | F  | -1.14445900 | 1.12830800  | 3.10093900  |
| C        | 3.60762500  | -1.08559700 | -1.38473400 | F  | -2.91156400 | -0.06760900 | 2.79906800  |
| H        | 3.70042400  | -1.63977600 | -2.31127700 | F  | -2.83418900 | 1.96736900  | 2.06192100  |
| C        | 2.76245600  | 0.01245300  | -1.32135000 | C  | -1.59338000 | 0.36355600  | 0.88849700  |
| H        | 2.20580900  | 0.34545900  | -2.19044500 | C  | -2.11775800 | 0.84085500  | 2.24839400  |
| N        | 1.24112400  | 2.44322700  | -1.41536000 | C  | -2.69314400 | 0.04267600  | -0.07561800 |
| N        | 0.37999500  | 1.71452200  | -0.65530200 | C  | -3.24693000 | -1.23185200 | 0.01603700  |
| <b>E</b> |             |             |             | H  | -2.83228200 | -1.94917700 | 0.71612300  |
| Br       | -0.39117600 | -1.27035800 | -1.90099400 | C  | -4.28885900 | -1.58971500 | -0.82673700 |
| C        | 1.94883900  | -0.68151200 | -0.01064500 | H  | -4.70568900 | -2.58718000 | -0.76785200 |
| B        | 3.23698200  | -1.30063400 | -0.93120600 | C  | -4.77915700 | -0.67842600 | -1.75613400 |
| H        | 3.02442700  | -2.25215800 | -1.59297100 | H  | -5.58616500 | -0.96347700 | -2.41986400 |
|          |             |             |             | C  | -4.23181200 | 0.59665300  | -1.83753700 |

|            |             |             |             |          |             |             |             |
|------------|-------------|-------------|-------------|----------|-------------|-------------|-------------|
| H          | -4.61222200 | 1.30662500  | -2.56170100 | F        | -2.49220600 | 2.86616600  | 1.06387800  |
| C          | -3.19233700 | 0.96058000  | -0.99050700 | C        | -1.49944800 | 0.84718500  | 0.33944800  |
| H          | -2.76425200 | 1.95265000  | -1.06911600 | C        | -1.76143400 | 1.82566700  | 1.48350900  |
| N          | -0.38092000 | 1.03424800  | 0.54959000  | C        | -2.75256200 | 0.29117400  | -0.26070900 |
| N          | -0.35938900 | -0.33582700 | 0.98571200  | C        | -3.45100200 | -0.69814100 | 0.42556700  |
| <b>TS3</b> |             |             |             | H        | -3.06851400 | -1.08034600 | 1.36460700  |
| Br         | -0.71250800 | -2.00276100 | -1.59728200 | C        | -4.60847400 | -1.22380500 | -0.13200400 |
| C          | 1.74497100  | -1.06918200 | -0.04352900 | H        | -5.14150900 | -2.01154900 | 0.38549000  |
| B          | 2.84258200  | -1.95274300 | -0.98738500 | C        | -5.06816300 | -0.75542100 | -1.35815900 |
| H          | 2.43552600  | -2.89107500 | -1.57023800 | H        | -5.96664500 | -1.17516000 | -1.79412100 |
| B          | 2.94468500  | -1.95223200 | 0.77485500  | C        | -4.37160400 | 0.24205700  | -2.03209500 |
| H          | 2.60501500  | -2.89103400 | 1.39531700  | H        | -4.72465500 | 0.59892200  | -2.99176300 |
| B          | 2.44897000  | -0.36002500 | 1.35996900  | C        | -3.21026500 | 0.76868500  | -1.48298800 |
| H          | 1.75707800  | -0.16601100 | 2.29008300  | H        | -2.63764500 | 1.51850800  | -2.01564900 |
| B          | 4.41557200  | -1.74807300 | -0.18541900 | N        | -0.41087500 | 1.17216200  | -0.55516400 |
| H          | 5.23238100  | -2.59981400 | -0.23050100 | N        | -0.35124700 | 0.07262100  | 0.57018400  |
| B          | 4.16251700  | -0.75906800 | 1.27280100  | <b>F</b> |             |             |             |
| H          | 4.77829900  | -0.88896000 | 2.27162400  | Br       | -0.82557100 | -2.40483500 | -0.96698300 |
| B          | 0.11336100  | -1.32095100 | 0.10889500  | C        | 1.72421900  | -1.13156200 | 0.01914800  |
| Br         | -0.36669600 | -2.50797900 | 1.67494600  | B        | 2.67146800  | -2.25625200 | -0.81797300 |
| S          | 1.48158900  | 3.40343100  | -0.21856200 | H        | 2.17340800  | -3.27546800 | -1.13047500 |
| C          | 2.14968200  | 0.53902600  | -0.06734300 | B        | 2.97839000  | -1.88136800 | 0.88056300  |
| C          | 0.05146000  | 4.43403200  | 0.19767300  | H        | 2.67941000  | -2.63790000 | 1.73162100  |
| H          | 0.00654100  | 4.53828400  | 1.27795600  | B        | 2.59943800  | -0.17431500 | 1.13311300  |
| H          | 0.21878900  | 5.40427200  | -0.26785400 | H        | 2.02754100  | 0.26116300  | 2.06686800  |
| H          | -0.86085500 | 3.97677900  | -0.18051900 | B        | 4.32813300  | -1.96314900 | -0.26095000 |
| C          | 1.25985900  | 3.41956500  | -2.03292100 | H        | 5.11500400  | -2.84225800 | -0.20845700 |
| H          | 1.94345700  | 2.69386400  | -2.46617500 | B        | 4.27654600  | -0.67132200 | 0.95719900  |
| H          | 0.22894000  | 3.15643600  | -2.26536000 | H        | 5.00487700  | -0.60093300 | 1.88366300  |
| H          | 1.50445500  | 4.42140400  | -2.38126300 | B        | 0.12786400  | -1.22848600 | 0.33285500  |
| B          | 3.61282300  | 0.83664400  | 0.74976000  | Br       | -0.32145700 | -1.70648800 | 2.24303000  |
| H          | 3.71418300  | 1.85797700  | 1.33572800  | S        | 1.35077000  | 3.21131400  | 0.21286700  |
| B          | 3.52739300  | 0.83013800  | -1.00962100 | C        | 2.13935300  | 0.42251500  | -0.41017800 |
| H          | 3.60969400  | 1.85094900  | -1.59947800 | C        | -0.01314400 | 4.27560500  | -0.35497900 |
| B          | 2.30203900  | -0.35770300 | -1.51428500 | H        | -0.62623200 | 4.55497400  | 0.49342300  |
| H          | 1.52154000  | -0.14476000 | -2.36899400 | H        | 0.44523700  | 5.16243400  | -0.78619300 |
| B          | 4.83437200  | -0.02922300 | -0.19999800 | H        | -0.60306500 | 3.75111400  | -1.10593500 |
| H          | 5.94264300  | 0.37445200  | -0.26288100 | C        | 2.42314500  | 3.54813100  | -1.22068200 |
| B          | 4.01364800  | -0.75879400 | -1.60498800 | H        | 3.38001300  | 3.06366100  | -1.07344200 |
| H          | 4.52606400  | -0.87951300 | -2.66197700 | H        | 1.94598200  | 3.18929200  | -2.13185700 |
| B          | 0.87752200  | 1.46930000  | -0.06595600 | H        | 2.55532600  | 4.62805000  | -1.25081500 |
| F          | -0.61358700 | 2.32508200  | 1.98178800  | B        | 3.70071900  | 0.79172600  | 0.15258600  |
| F          | -2.40518000 | 1.23458700  | 2.47630700  | H        | 3.92390200  | 1.88814300  | 0.53499400  |

|          |             |             |             |          |             |             |             |
|----------|-------------|-------------|-------------|----------|-------------|-------------|-------------|
| B        | 3.39838700  | 0.41721300  | -1.54990500 | B        | 3.47680400  | 1.92731400  | -0.08751900 |
| H        | 3.41025000  | 1.24448800  | -2.39058700 | H        | 3.39760400  | 3.08782900  | 0.10406300  |
| B        | 2.10156900  | -0.78403900 | -1.61910500 | B        | 3.36640100  | 1.26375000  | -1.73608900 |
| H        | 1.22926200  | -0.74213700 | -2.40487800 | H        | 3.20844300  | 1.97488600  | -2.66297000 |
| B        | 4.77787500  | -0.30889700 | -0.71057600 | B        | 2.37352500  | -0.21672600 | -1.66377500 |
| H        | 5.88101200  | 0.01700000  | -0.98089400 | H        | 1.54816200  | -0.46892800 | -2.46220600 |
| B        | 3.78029200  | -1.28756700 | -1.80980700 | B        | 4.81205400  | 0.97575900  | -0.75828100 |
| H        | 4.15792600  | -1.66516300 | -2.86262000 | H        | 5.83567800  | 1.49336500  | -1.03684700 |
| B        | 0.80371000  | 1.30789700  | -0.24543300 | B        | 4.12321200  | -0.34115200 | -1.73575600 |
| F        | -0.87310000 | 2.57886600  | 1.62487200  | H        | 4.63529400  | -0.76543400 | -2.71034000 |
| F        | -2.73451300 | 1.56588300  | 1.85593400  | B        | 0.61287800  | 1.45691800  | -0.70849700 |
| F        | -2.53807100 | 3.06656600  | 0.32404200  | F        | -0.51622300 | 3.18912200  | 0.45940900  |
| C        | -1.49661300 | 0.98093000  | -0.06356200 | F        | -2.13703600 | 2.38683800  | 1.63906900  |
| C        | -1.91112100 | 2.06247100  | 0.94487800  | F        | -2.54906600 | 3.32074700  | -0.26642800 |
| C        | -2.70865900 | 0.22910100  | -0.54432200 | C        | -1.53766700 | 1.20467400  | -0.31287800 |
| C        | -3.42975200 | -0.60880300 | 0.30428400  | C        | -1.70418800 | 2.55149300  | 0.40019600  |
| H        | -3.09883200 | -0.77173600 | 1.32216900  | C        | -2.78104500 | 0.39477100  | -0.45886200 |
| C        | -4.54271500 | -1.27800500 | -0.18323900 | C        | -3.33371200 | -0.22092900 | 0.66178800  |
| H        | -5.08885600 | -1.94963200 | 0.46712400  | H        | -2.85926000 | -0.12314600 | 1.63072300  |
| C        | -4.94454900 | -1.10169400 | -1.50301900 | C        | -4.47802800 | -0.99224100 | 0.51239000  |
| H        | -5.81231900 | -1.63022500 | -1.87905800 | H        | -4.90452800 | -1.48913300 | 1.37440500  |
| C        | -4.22915000 | -0.25632800 | -2.34271900 | C        | -5.06640000 | -1.13342200 | -0.73992700 |
| H        | -4.53483500 | -0.12373400 | -3.37304600 | H        | -5.95774600 | -1.73890600 | -0.85072500 |
| C        | -3.10743200 | 0.40816300  | -1.86484700 | C        | -4.51114200 | -0.50876800 | -1.85157200 |
| H        | -2.51921700 | 1.03779900  | -2.52072300 | H        | -4.96625600 | -0.62625800 | -2.82705400 |
| N        | -0.43798100 | 1.10592900  | -1.06552000 | C        | -3.36107300 | 0.25645200  | -1.71579800 |
| N        | -0.26836200 | 0.31466700  | 0.26417900  | H        | -2.90054400 | 0.72441000  | -2.57706500 |
| <b>G</b> |             |             |             | N        | -0.59415900 | 1.22871000  | -1.43284300 |
| Br       | -0.35174900 | -2.23882200 | -0.91093500 | N        | -0.29022900 | 0.57876500  | 0.02655200  |
| C        | 1.97285300  | -0.44062300 | 0.01129700  | <b>H</b> |             |             |             |
| B        | 3.19376900  | -1.40410300 | -0.64224200 | Br       | -0.88540700 | -2.66107800 | 0.69714800  |
| H        | 2.94469300  | -2.53983500 | -0.82865700 | C        | 1.72739200  | -1.13846900 | 0.13834100  |
| B        | 3.31708100  | -0.74686300 | 0.99570900  | B        | 2.74462700  | -2.48004400 | 0.26816900  |
| H        | 3.15117300  | -1.43059600 | 1.93948100  | H        | 2.35411300  | -3.39961500 | 0.89162500  |
| B        | 2.55530100  | 0.84749100  | 0.99698000  | B        | 3.14283100  | -0.94405300 | 1.04922100  |
| H        | 1.83927000  | 1.26165100  | 1.83493200  | H        | 3.02588100  | -0.80480300 | 2.21269700  |
| B        | 4.71205800  | -0.66505400 | -0.09092600 | B        | 2.56711500  | 0.35654700  | 0.00617300  |
| H        | 5.66864400  | -1.32800500 | 0.10564200  | H        | 1.98811300  | 1.31436400  | 0.36520900  |
| B        | 4.30450200  | 0.73239300  | 0.93250100  | B        | 4.39240500  | -1.82332000 | 0.15568100  |
| H        | 4.94694500  | 1.07750400  | 1.85994300  | H        | 5.28800900  | -2.34092400 | 0.72409100  |
| B        | 0.39165100  | -0.85834800 | 0.29858700  | B        | 4.27013900  | -0.05488400 | -0.00176400 |
| Br       | -0.00808400 | -1.19270600 | 2.23103700  | H        | 5.05643200  | 0.70212400  | 0.44866400  |
| C        | 2.10407500  | 1.12434300  | -0.63076500 | B        | 0.16131000  | -0.97817000 | 0.67088600  |

|            |             |             |             |    |             |             |             |
|------------|-------------|-------------|-------------|----|-------------|-------------|-------------|
| Br         | -0.00234100 | 0.07271400  | 2.36419500  | C  | 1.98190300  | -0.65138000 | -0.08011300 |
| C          | 1.94747600  | -0.42537100 | -1.38229900 | B  | 3.12506500  | -1.86057000 | -0.44456000 |
| B          | 3.45641300  | 0.29745600  | -1.53962900 | H  | 2.86111000  | -2.97127800 | -0.15551900 |
| H          | 3.52845500  | 1.29275300  | -2.16893900 | B  | 3.44257800  | -0.65365200 | 0.80294100  |
| B          | 3.06730300  | -1.25201300 | -2.32549000 | H  | 3.39409600  | -0.93315000 | 1.94553900  |
| H          | 2.87567700  | -1.30513400 | -3.48747600 | B  | 2.69310100  | 0.84683100  | 0.29042800  |
| B          | 1.93759000  | -2.13606800 | -1.26697100 | H  | 2.11848600  | 1.54382200  | 1.03407400  |
| H          | 0.99686500  | -2.71033600 | -1.67465400 | B  | 4.70058100  | -1.03691200 | -0.37726900 |
| B          | 4.58686400  | -1.06279600 | -1.43695300 | H  | 5.67489200  | -1.61704700 | -0.04787900 |
| H          | 5.61765500  | -1.03062000 | -2.01128100 | B  | 4.41625900  | 0.65457500  | 0.08818100  |
| B          | 3.64097300  | -2.56232500 | -1.27439100 | H  | 5.15541300  | 1.29418000  | 0.75141200  |
| H          | 3.97917400  | -3.59694300 | -1.72977700 | B  | 0.45069300  | -0.83735000 | 0.52074000  |
| B          | 0.50220300  | 0.01760300  | -1.62793600 | Br | 0.36886300  | -0.90593000 | 2.51951300  |
| F          | -0.35728200 | 2.24324300  | -1.96360700 | C  | 2.02169200  | 0.52767000  | -1.24910100 |
| F          | -2.05231500 | 2.69945900  | -0.69432200 | B  | 3.45674100  | 1.42158800  | -1.19897500 |
| F          | -2.36967300 | 1.96583000  | -2.69747800 | H  | 3.40485000  | 2.57603500  | -1.44502200 |
| C          | -1.60727000 | 0.41338000  | -1.13502200 | B  | 3.15743100  | 0.20501400  | -2.45465200 |
| C          | -1.60592000 | 1.86981400  | -1.61588800 | H  | 2.89801800  | 0.53452300  | -3.55623500 |
| C          | -2.92049800 | -0.09113000 | -0.64268500 | B  | 2.20038400  | -1.10444700 | -1.74279500 |
| C          | -3.38967600 | 0.34227400  | 0.59514000  | H  | 1.30526300  | -1.60232900 | -2.31035200 |
| H          | -2.80273100 | 1.03030400  | 1.19244900  | B  | 4.71469400  | 0.24250900  | -1.61307600 |
| C          | -4.59977000 | -0.14746600 | 1.06729100  | H  | 5.69599300  | 0.58166900  | -2.17570600 |
| H          | -4.96419800 | 0.17025700  | 2.03586200  | B  | 3.92474800  | -1.31632700 | -1.94570100 |
| C          | -5.33303300 | -1.04898400 | 0.30311500  | H  | 4.32212700  | -2.09013800 | -2.74327300 |
| H          | -6.27516900 | -1.43092800 | 0.67747900  | B  | 0.49576900  | 0.82950800  | -1.33811400 |
| C          | -4.85957700 | -1.46909700 | -0.93532600 | F  | -1.22810900 | 3.06111300  | -1.24756100 |
| H          | -5.42915600 | -2.17615100 | -1.52510700 | F  | -2.97905100 | 2.47012000  | -0.14101400 |
| C          | -3.64555500 | -0.99365100 | -1.41289800 | F  | -2.86285900 | 2.08756100  | -2.25723300 |
| H          | -3.24883500 | -1.33547700 | -2.36098300 | C  | -1.54644600 | 0.70140100  | -0.92968300 |
| N          | -0.79257500 | -0.46745300 | -1.97276100 | C  | -2.16487100 | 2.10297400  | -1.12925800 |
| N          | -0.38942200 | 0.02636600  | -0.47458400 | C  | -2.66253000 | -0.26100500 | -0.63039100 |
| S          | 0.63525400  | 3.65078600  | 0.80249600  | C  | -3.12015200 | -0.41244100 | 0.67411300  |
| C          | 1.99537100  | 4.13600500  | -0.29344700 | H  | -2.64617200 | 0.12952800  | 1.48624800  |
| H          | 2.44468800  | 5.07095400  | 0.04187400  | C  | -4.15288500 | -1.30105200 | 0.93838800  |
| H          | 2.75573600  | 3.35339800  | -0.33414200 | H  | -4.49637400 | -1.44131500 | 1.95561200  |
| H          | 1.57709900  | 4.28002800  | -1.28936300 | C  | -4.73411700 | -2.01841100 | -0.10208700 |
| C          | 1.58858400  | 3.39977600  | 2.32107800  | H  | -5.53534200 | -2.71726500 | 0.10566200  |
| H          | 2.29184400  | 2.57259600  | 2.20530400  | C  | -4.28621100 | -1.84509700 | -1.40733400 |
| H          | 2.12006700  | 4.31275000  | 2.59024400  | H  | -4.73825800 | -2.40620200 | -2.21595300 |
| H          | 0.88075700  | 3.15021400  | 3.10998000  | C  | -3.24752100 | -0.96351100 | -1.67647900 |
|            |             |             |             | H  | -2.85862900 | -0.84111600 | -2.67997400 |
|            |             |             |             | N  | -0.63242200 | 0.40089300  | -2.01166500 |
|            |             |             |             | N  | -0.30869100 | 0.65123500  | -0.06103000 |
| <b>TS4</b> |             |             |             | S  | -0.42480600 | 2.30651900  | 1.43246300  |
| Br         | -0.42939900 | -2.46563300 | -0.19767200 |    |             |             |             |

|          |             |             |             |            |             |             |             |
|----------|-------------|-------------|-------------|------------|-------------|-------------|-------------|
| C        | 0.65177400  | 3.54011500  | 0.64132200  | C          | -4.08609200 | -1.47465800 | 0.67528200  |
| H        | 0.07305800  | 4.45060100  | 0.50021600  | H          | -4.45353600 | -1.78340400 | 1.64605300  |
| H        | 1.51665500  | 3.71387900  | 1.27712600  | C          | -4.60704300 | -2.04115600 | -0.48235500 |
| H        | 0.98572600  | 3.17147800  | -0.32780400 | H          | -5.38549100 | -2.79142300 | -0.41275700 |
| C        | 0.36366100  | 2.25579700  | 3.06382000  | C          | -4.12895800 | -1.64560700 | -1.72791800 |
| H        | 1.37005300  | 1.84693400  | 3.00463200  | H          | -4.53588400 | -2.08417900 | -2.63085200 |
| H        | 0.37296900  | 3.29266600  | 3.40624600  | C          | -3.11843800 | -0.69895800 | -1.81808900 |
| H        | -0.25633100 | 1.64668800  | 3.71331300  | H          | -2.70667000 | -0.39880000 | -2.77374800 |
| <b>I</b> |             |             |             | N          | -0.68247200 | 0.91796400  | -1.94840300 |
| Br       | -0.37122600 | -2.28033700 | -0.63900000 | N          | -0.27692400 | 0.74962900  | 0.23782900  |
| C        | 2.01304800  | -0.47343200 | -0.10963100 | S          | -0.42811400 | 1.62624200  | 1.80151000  |
| B        | 3.21779200  | -1.60332900 | -0.49561700 | C          | -0.13617900 | 3.38026100  | 1.42215400  |
| H        | 3.01136900  | -2.73098700 | -0.22319600 | H          | -1.05195300 | 3.83029700  | 1.06722700  |
| B        | 3.46738800  | -0.40272100 | 0.77987200  | H          | 0.14515800  | 3.82929600  | 2.37261300  |
| H        | 3.43200000  | -0.71253200 | 1.91911900  | H          | 0.66960700  | 3.47078300  | 0.69361500  |
| B        | 2.66402300  | 1.07252000  | 0.26888700  | C          | 0.98589200  | 1.43832700  | 2.97506100  |
| H        | 2.08740400  | 1.82457100  | 0.94877100  | H          | 1.67471500  | 0.66169200  | 2.67559000  |
| B        | 4.75266300  | -0.70740400 | -0.40072100 | H          | 1.48968200  | 2.39888700  | 3.03199900  |
| H        | 5.75133400  | -1.24946600 | -0.07916000 | H          | 0.50355500  | 1.16186100  | 3.91122500  |
| B        | 4.39024500  | 0.95846800  | 0.08996100  | <b>TS5</b> |             |             |             |
| H        | 5.08946700  | 1.61966000  | 0.77557600  | Br         | -0.38263500 | -2.31969000 | -0.36926600 |
| B        | 0.47528400  | -0.82255200 | 0.42412600  | C          | 2.00636900  | -0.46964400 | -0.12720700 |
| Br       | 0.31525100  | -1.49326300 | 2.34047700  | B          | 3.16227300  | -1.63183600 | -0.55999600 |
| C        | 1.99186700  | 0.73749900  | -1.23859400 | H          | 2.96201900  | -2.74568300 | -0.23196600 |
| B        | 3.40244400  | 1.70077300  | -1.19197100 | B          | 3.52525600  | -0.38905800 | 0.64650400  |
| H        | 3.28817900  | 2.85655200  | -1.40280600 | H          | 3.57015700  | -0.65219900 | 1.79692200  |
| B        | 3.15288200  | 0.50561900  | -2.46208500 | B          | 2.70425500  | 1.07732700  | 0.13813900  |
| H        | 2.88201400  | 0.83904700  | -3.55878200 | H          | 2.19593600  | 1.86544000  | 0.83071600  |
| B        | 2.26722100  | -0.85928900 | -1.78977600 | B          | 4.71142400  | -0.75957000 | -0.61658900 |
| H        | 1.41865700  | -1.37896200 | -2.39964400 | H          | 5.72452700  | -1.30530000 | -0.35089100 |
| B        | 4.71239200  | 0.59323800  | -1.61650600 | B          | 4.41007000  | 0.92833500  | -0.16643100 |
| H        | 5.67852600  | 0.98766900  | -2.16938900 | H          | 5.16849900  | 1.60464700  | 0.43678600  |
| B        | 3.99636200  | -0.98875700 | -1.98014300 | B          | 0.50303200  | -0.76709700 | 0.52953700  |
| H        | 4.43211500  | -1.73101600 | -2.78751600 | Br         | 0.46191800  | -1.30418300 | 2.49849600  |
| B        | 0.45647700  | 1.05731500  | -1.25519700 | C          | 1.91307000  | 0.69922500  | -1.29902100 |
| F        | -1.43144900 | 3.30752500  | -0.97291000 | B          | 3.33766800  | 1.63838500  | -1.39732200 |
| F        | -2.80940900 | 2.50523900  | 0.48389000  | H          | 3.22569400  | 2.78755400  | -1.64397100 |
| F        | -3.20096200 | 2.29654100  | -1.62729300 | B          | 2.97656900  | 0.40056100  | -2.59626200 |
| C        | -1.51148700 | 0.90295700  | -0.79445100 | H          | 2.62774500  | 0.69611600  | -3.68191000 |
| C        | -2.24028800 | 2.27163000  | -0.72013500 | B          | 2.12497900  | -0.92080700 | -1.80567500 |
| C        | -2.58482600 | -0.15203000 | -0.65609600 | H          | 1.22637000  | -1.45248200 | -2.32830300 |
| C        | -3.08196200 | -0.51888200 | 0.58955200  | B          | 4.59706900  | 0.49390400  | -1.87613600 |
| H        | -2.66820800 | -0.09543400 | 1.49825000  | H          | 5.52354500  | 0.85211400  | -2.51491000 |

|          |             |             |             |   |             |             |             |
|----------|-------------|-------------|-------------|---|-------------|-------------|-------------|
| B        | 3.83356300  | -1.08769100 | -2.12238000 | C | -0.61068500 | -2.86794400 | -1.60553900 |
| H        | 4.19514400  | -1.86784200 | -2.93105000 | H | -0.87928600 | -3.92439400 | -1.61475000 |
| B        | 0.37976300  | 1.03828200  | -1.22045200 | H | -1.48947900 | -2.22708700 | -1.55530900 |
| F        | -1.68008000 | 3.30488000  | -1.08848900 | H | 0.00347700  | -2.62476200 | -2.47236700 |
| F        | -2.80303100 | 2.45991600  | 0.55259100  | C | -2.73965900 | 0.03407500  | 0.24372400  |
| F        | -3.47153900 | 2.20656000  | -1.48491300 | C | -2.68182800 | 0.12652100  | 1.77842300  |
| C        | -1.62132600 | 0.90416400  | -0.88812400 | C | -4.07674100 | 0.01852400  | -0.39314200 |
| C        | -2.39535200 | 2.24201900  | -0.71432300 | C | -5.26096600 | -0.05919700 | 0.34651700  |
| C        | -2.60385600 | -0.21430900 | -0.72598900 | H | -5.24133500 | -0.10906100 | 1.42686200  |
| C        | -3.14300000 | -0.53115600 | 0.51729200  | C | -6.48593900 | -0.07269100 | -0.30793900 |
| H        | -2.80036200 | -0.02021400 | 1.41078100  | H | -7.40007400 | -0.13173100 | 0.26937900  |
| C        | -4.07478900 | -1.55398600 | 0.61694900  | C | -6.53918900 | -0.00457000 | -1.69478000 |
| H        | -4.47156900 | -1.82874300 | 1.58622500  | H | -7.49735400 | -0.00983700 | -2.20026300 |
| C        | -4.48316100 | -2.23583000 | -0.52522600 | C | -5.36231400 | 0.07988700  | -2.43564700 |
| H        | -5.20645500 | -3.03826100 | -0.44358900 | H | -5.40292400 | 0.14613600  | -3.51578000 |
| C        | -3.96374300 | -1.89258600 | -1.76903400 | C | -4.13764200 | 0.09157500  | -1.78958400 |
| H        | -4.28268500 | -2.42397900 | -2.65728900 | H | -3.21327900 | 0.17514700  | -2.34856000 |
| C        | -3.02059300 | -0.87981300 | -1.87387100 | B | -0.27882900 | 0.08323900  | -0.20939900 |
| H        | -2.57560600 | -0.61374000 | -2.82473500 | N | -1.66872900 | -0.05528500 | -0.40708800 |
| N        | -0.74853000 | 0.95895900  | -1.95181200 | B | 1.28786600  | 1.73195500  | 1.26800700  |
| N        | -0.25327000 | 0.74887600  | 0.27774500  | H | 1.08522300  | 0.99114000  | 2.15836500  |
| S        | -0.31274800 | 1.73479300  | 1.73887300  | B | 2.88873900  | 2.28221500  | 0.76378200  |
| C        | -0.04626700 | 3.44259700  | 1.18315300  | H | 3.81687800  | 1.93666900  | 1.40128500  |
| H        | -0.96704800 | 3.84623100  | 0.78997200  | B | 2.94941100  | 2.26183900  | -1.00485500 |
| H        | 0.23296600  | 3.99220000  | 2.07996900  | H | 3.91863300  | 1.90214700  | -1.56936000 |
| H        | 0.75767300  | 3.47088800  | 0.44685900  | B | 1.38554500  | 1.69853900  | -1.60331500 |
| C        | 1.14101500  | 1.67412000  | 2.88645200  | H | 1.23825300  | 0.93430100  | -2.48699100 |
| H        | 1.82357400  | 0.87065900  | 2.64954500  | B | 0.07050000  | 2.87111300  | 0.65828900  |
| H        | 1.64155800  | 2.63687300  | 2.83295600  | H | -0.97042000 | 2.91067800  | 1.21731800  |
| H        | 0.68204700  | 1.49506000  | 3.85765000  | B | 1.63612000  | 3.45097900  | 1.26389700  |
| <b>2</b> |             |             |             | H | 1.71603700  | 4.03429600  | 2.28756600  |
| S        | 0.45156300  | -2.59113900 | -0.17640300 | B | 2.66605700  | 3.78758600  | -0.14663100 |
| Br       | 3.04238800  | -1.26109400 | 1.58667600  | H | 3.49027400  | 4.63390500  | -0.12774700 |
| Br       | 3.17724200  | -1.29479300 | -1.71792500 | B | 1.73602800  | 3.41686800  | -1.61666200 |
| F        | -1.42457300 | 0.18583000  | 2.21114100  | H | 1.88698800  | 3.97537000  | -2.64628700 |
| F        | -3.23307600 | -0.97614000 | 2.32278000  | B | 0.13218400  | 2.85239700  | -1.10819200 |
| F        | -3.33657900 | 1.18371900  | 2.24381900  | H | -0.86633600 | 2.87674900  | -1.73849300 |
| C        | 2.05898100  | 1.11182200  | -0.13612100 | B | 0.92920400  | 4.15402000  | -0.21114500 |
| C        | 0.45711800  | 1.46921200  | -0.19533700 | H | 0.50574900  | 5.25657400  | -0.23838700 |
| C        | -0.67488700 | -2.89177900 | 1.19869900  | B | 2.19982700  | -0.51003400 | -0.11030100 |
| H        | -0.77917900 | -3.97168200 | 1.30409600  | N | 0.70344900  | -0.96239700 | -0.16525800 |
| H        | -0.18027300 | -2.47204800 | 2.07487500  |   |             |             |             |
| H        | -1.63937600 | -2.42132500 | 1.02446200  |   |             |             |             |



# NMR Figures

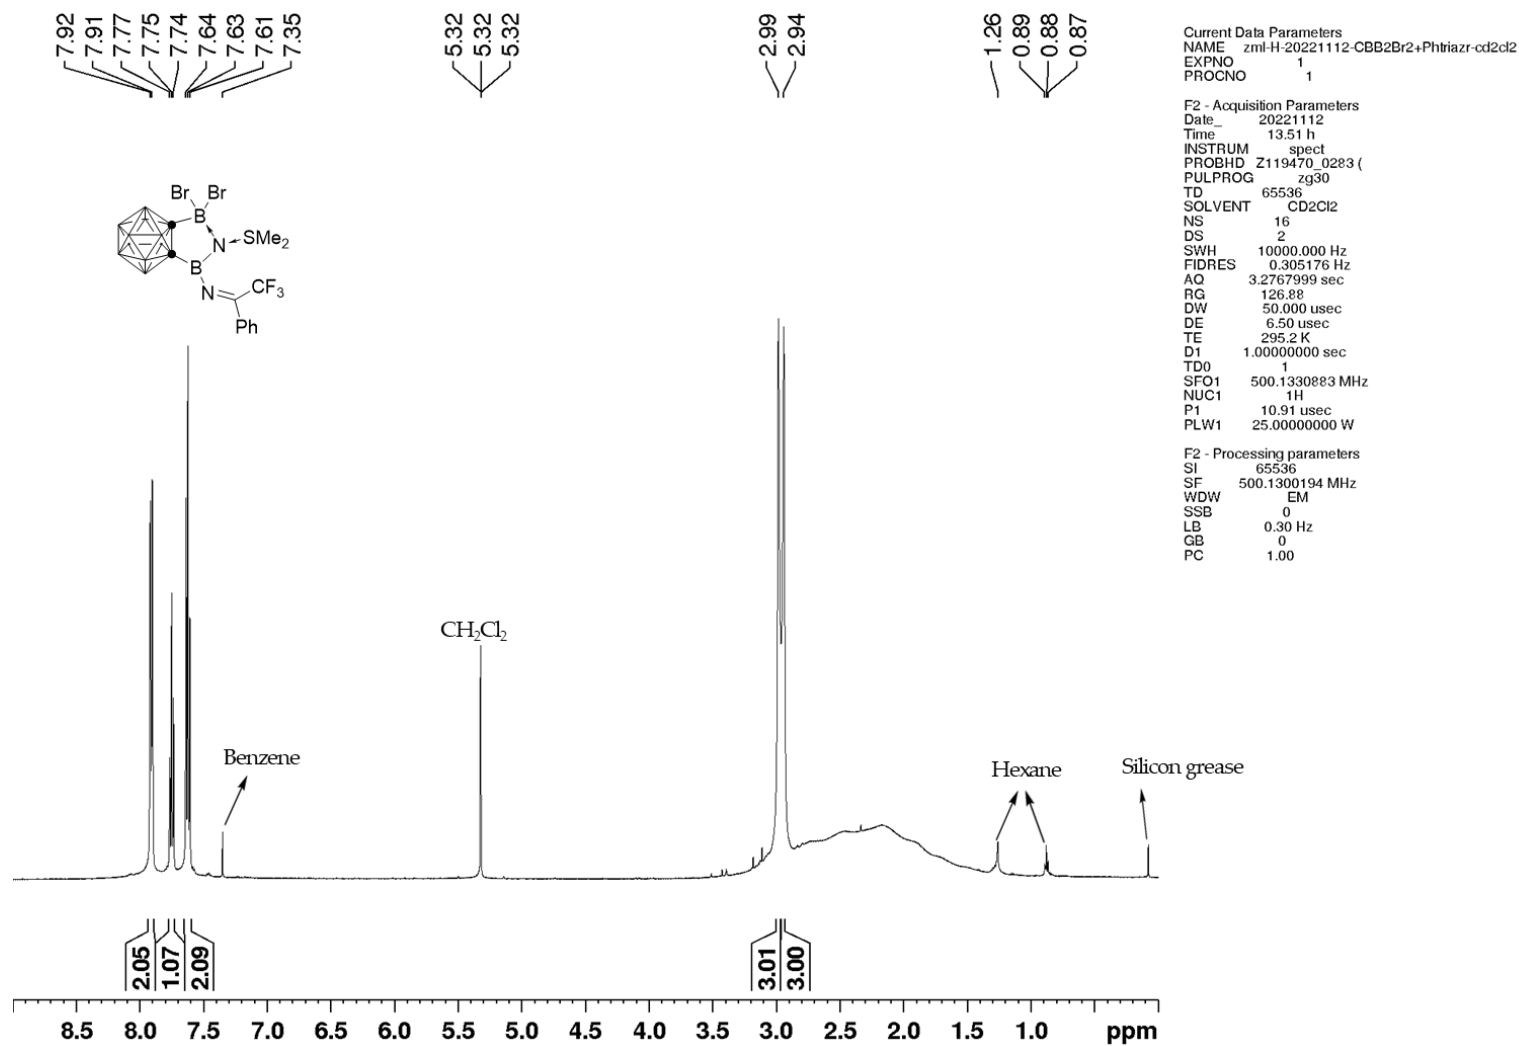

Figure S4. <sup>1</sup>H NMR spectrum of compound 2 in CD<sub>2</sub>Cl<sub>2</sub>.

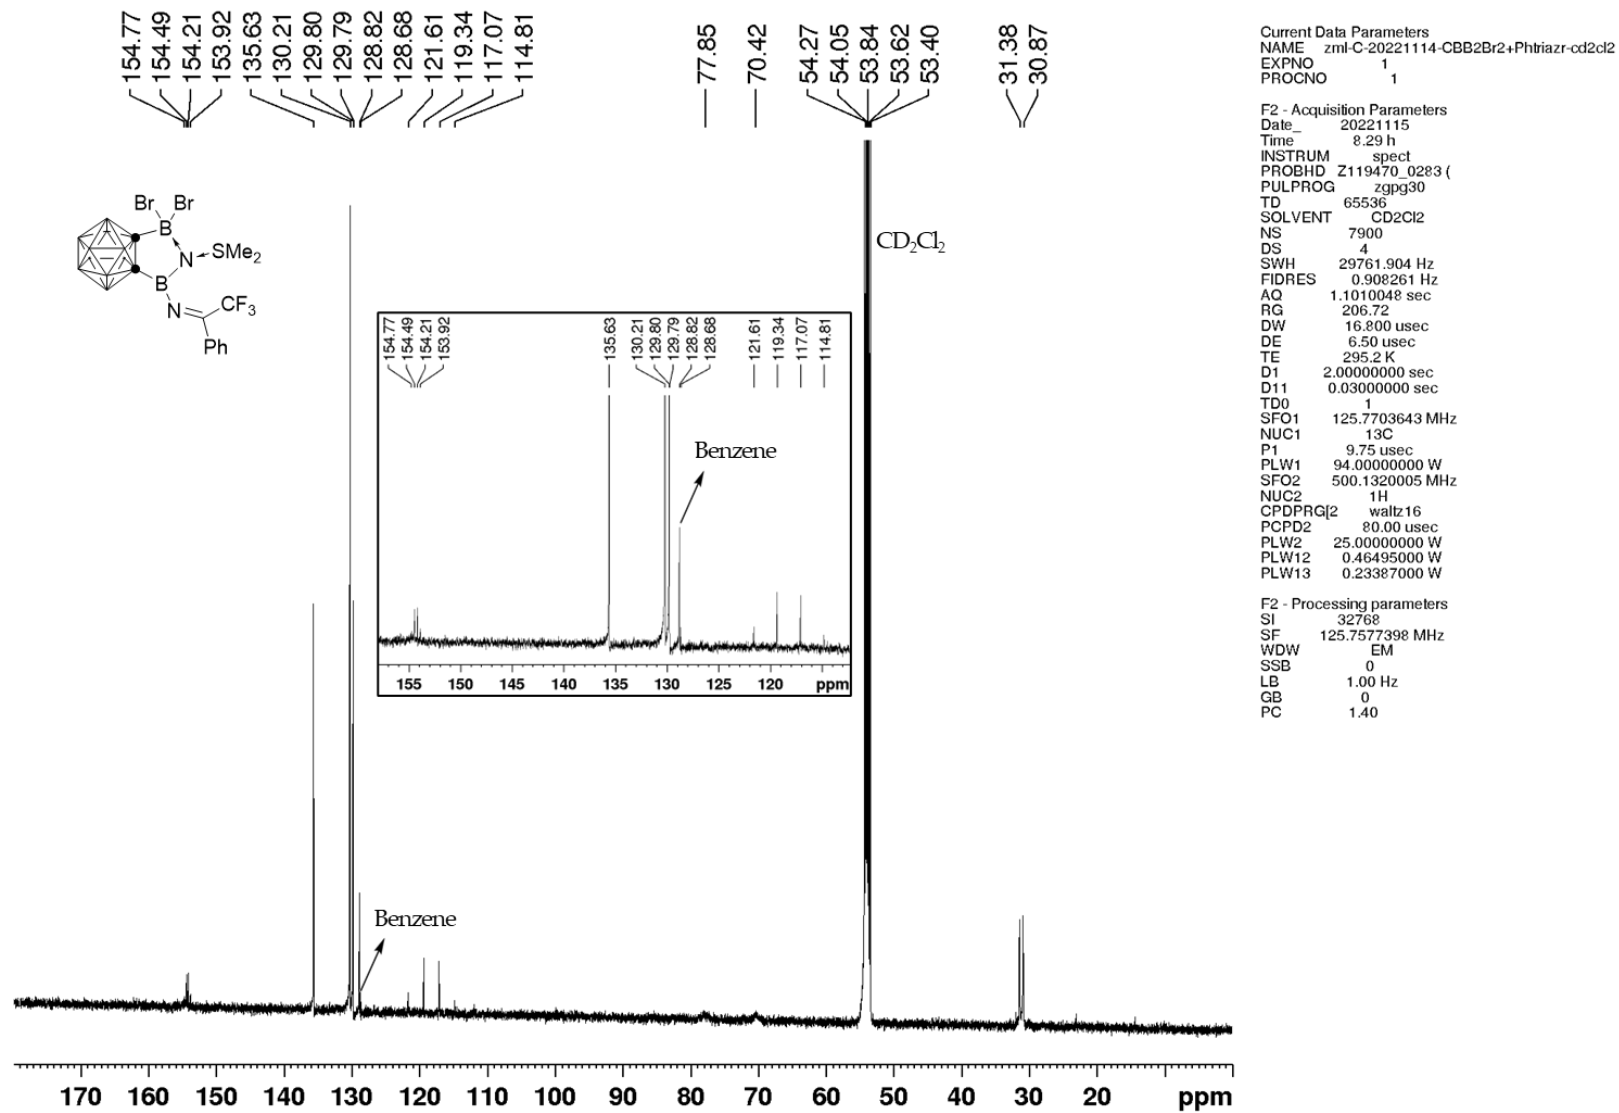

Figure S5.  $^{13}\text{C}\{^1\text{H}\}$  NMR spectrum of compound **2** in  $\text{CD}_2\text{Cl}_2$ .

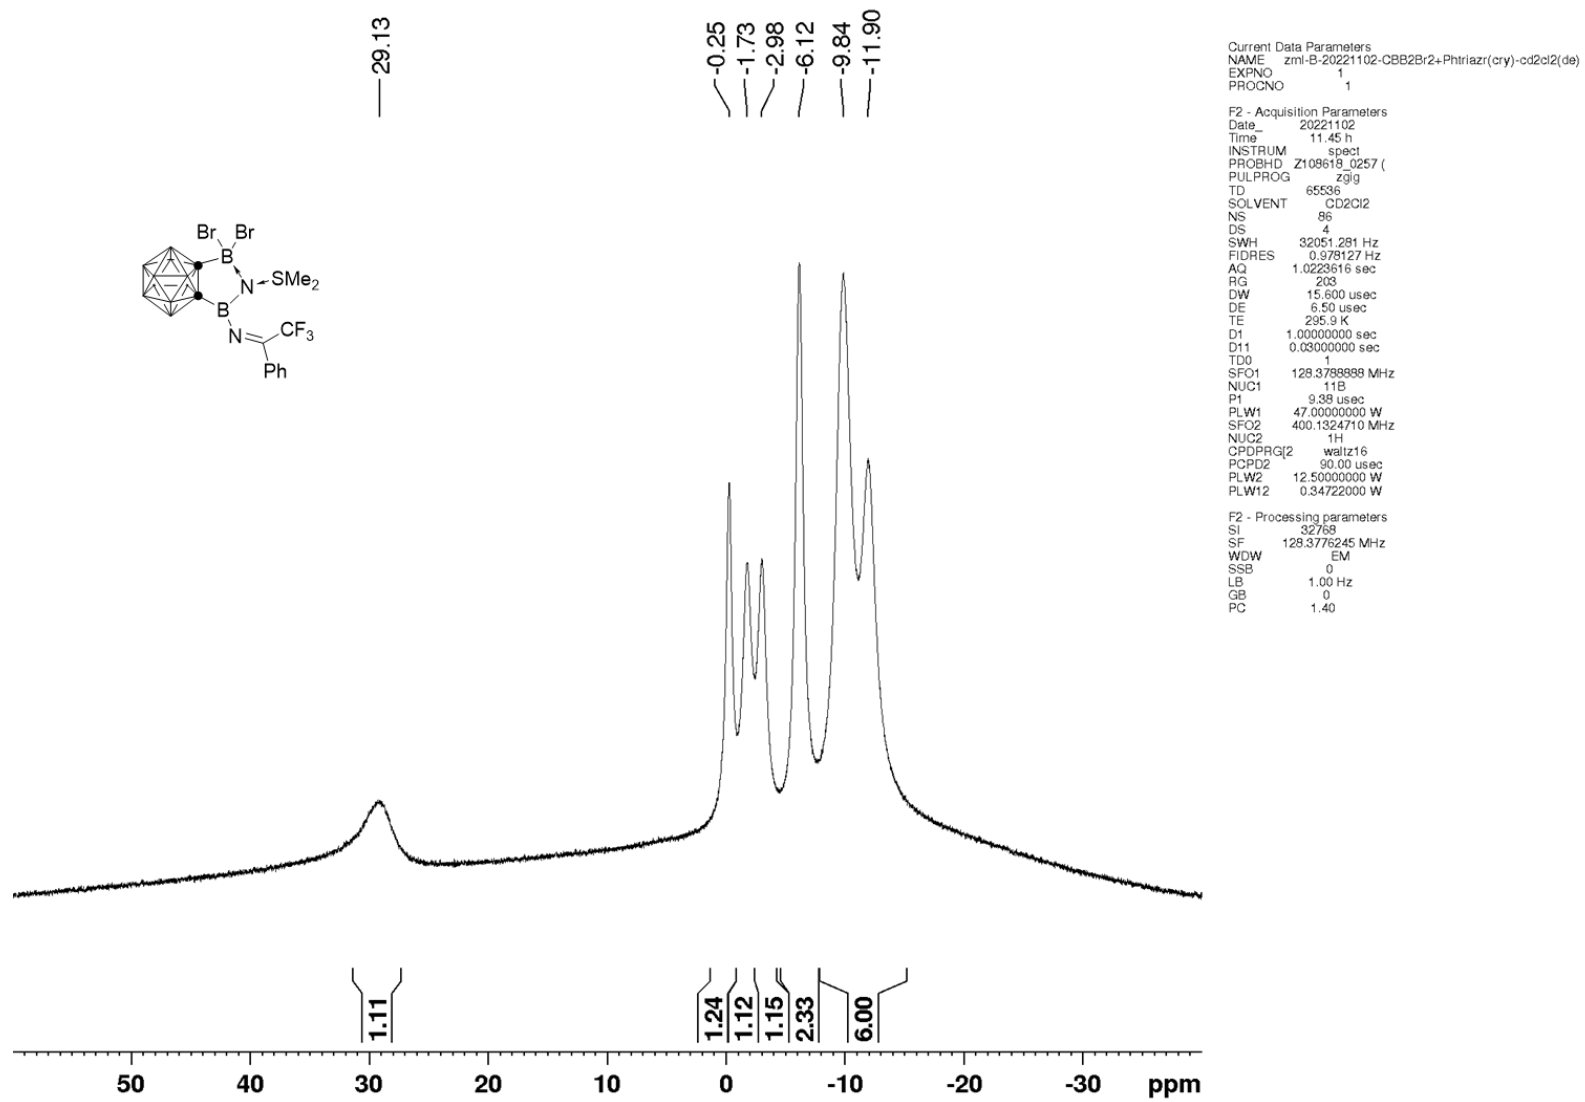

Figure S6. <sup>11</sup>B{<sup>1</sup>H} NMR spectrum of compound **2** in CD<sub>2</sub>Cl<sub>2</sub>.

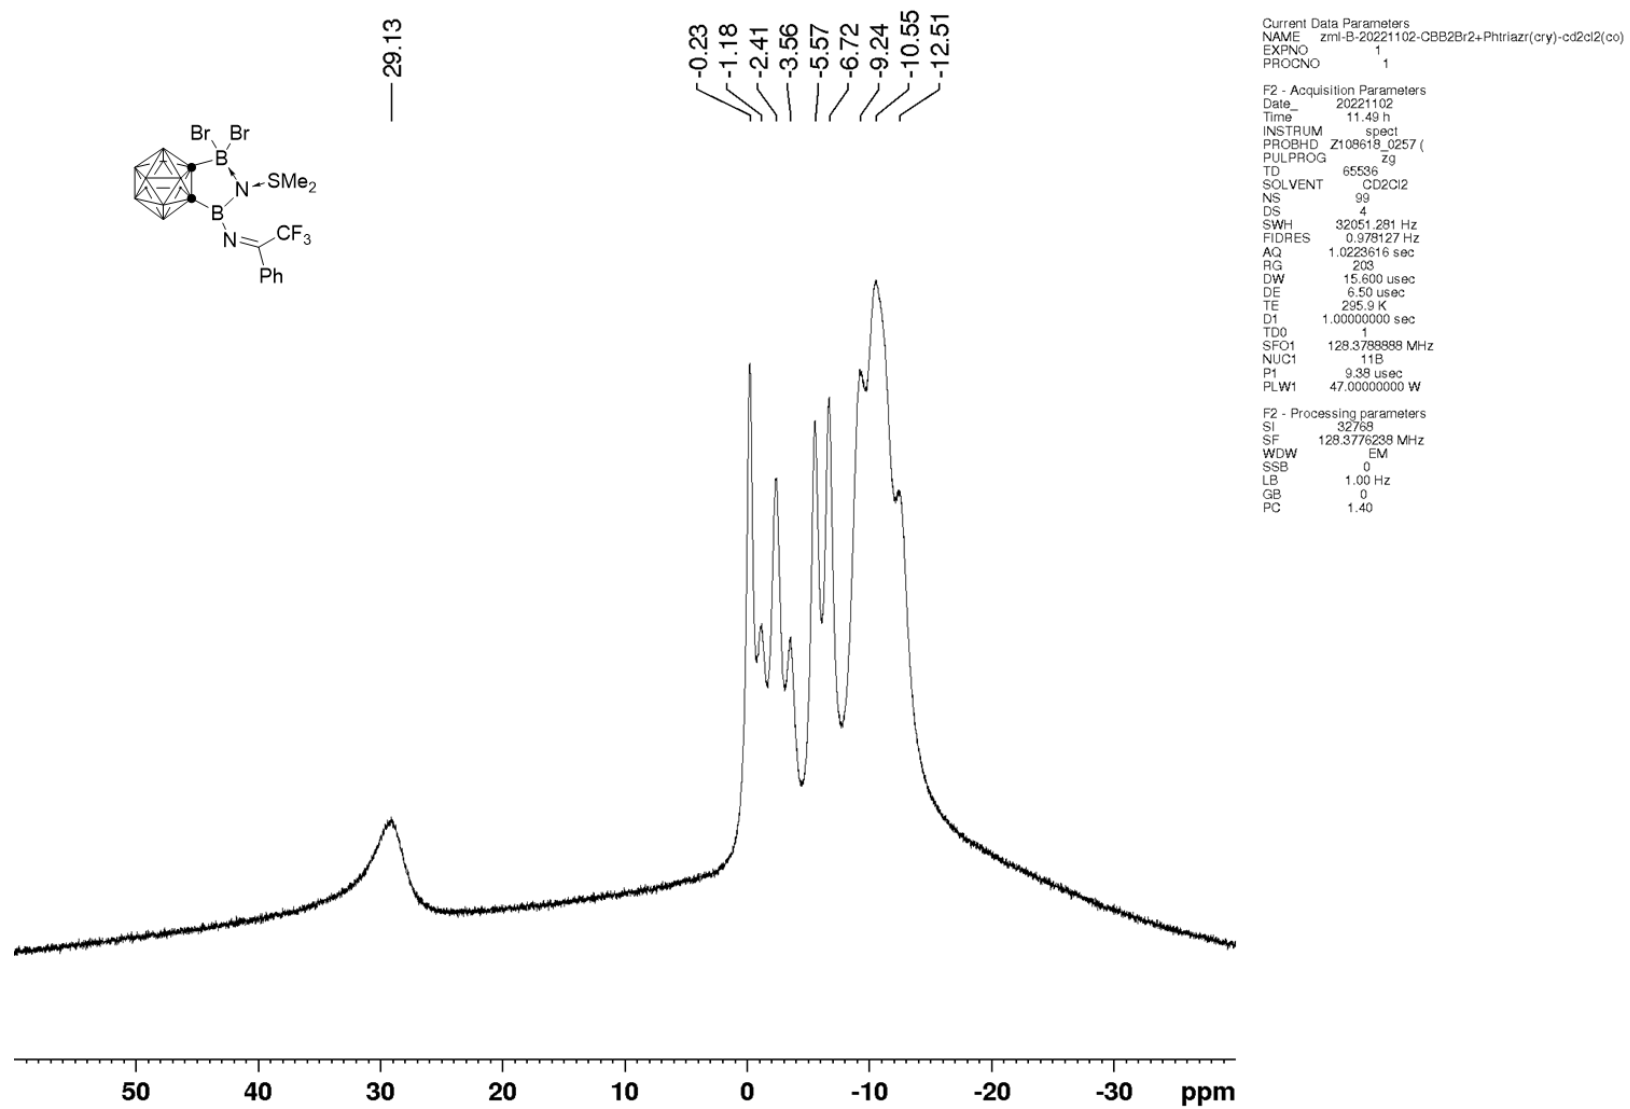

Figure S7. <sup>11</sup>B NMR spectrum of compound 2 in CD<sub>2</sub>Cl<sub>2</sub>.

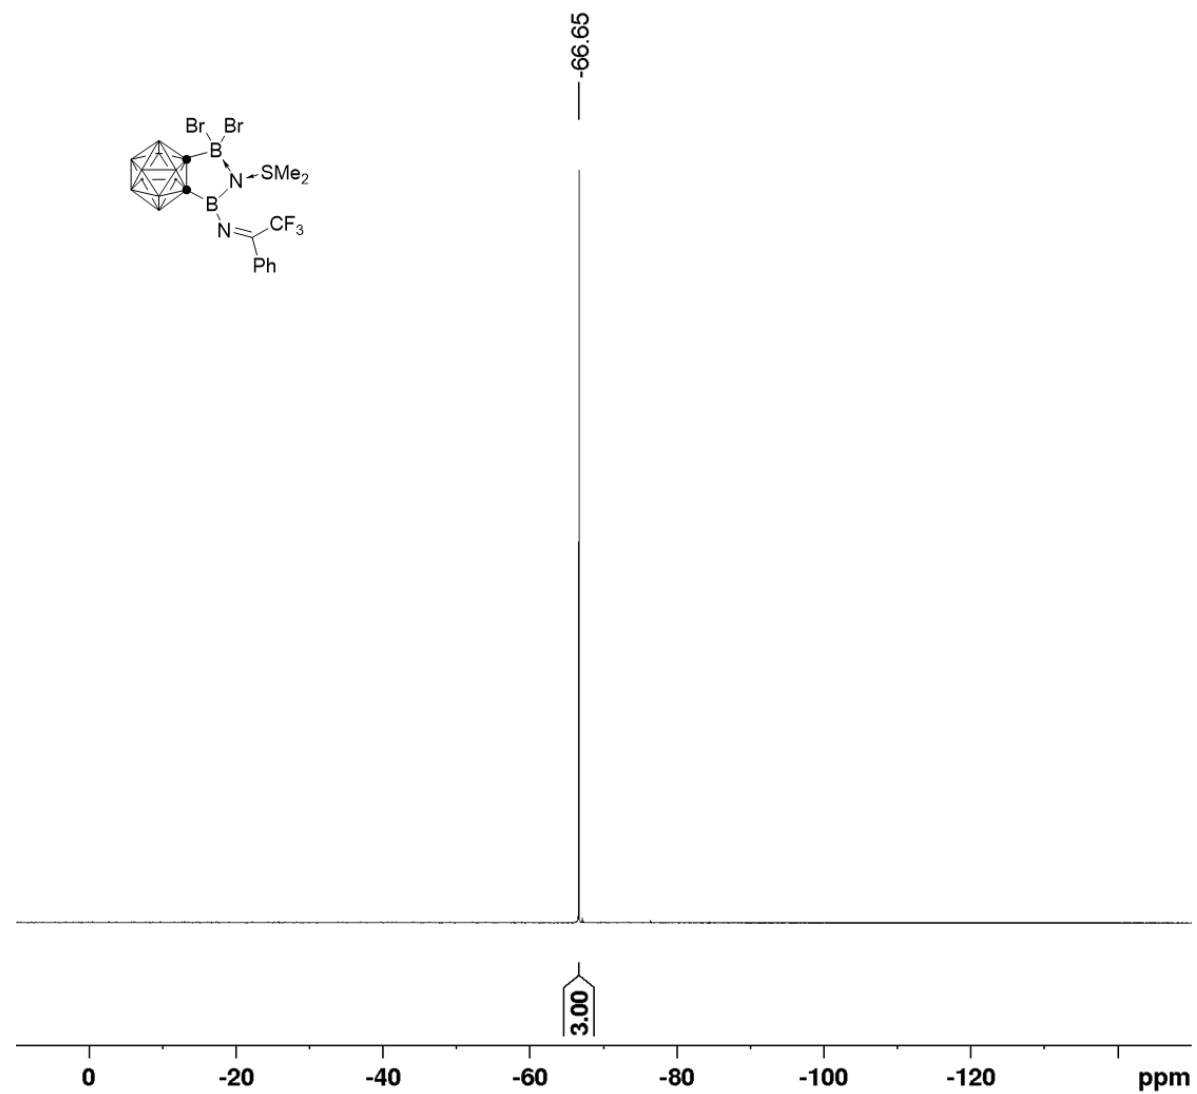

Current Data Parameters  
 NAME zml-F-20221112-CBB2Br2+Phtriazi-cd2cl2  
 EXPNO 1  
 PROCNO 1

F2 - Acquisition Parameters  
 Date\_ 20221112  
 Time 13.39 h  
 INSTRUM spect  
 PROBHD Z119470\_0283 (Z119470)  
 PULPROG zgpg30  
 TD 131072  
 SOLVENT CD2Cl2  
 NS 16  
 DS 4  
 SWH 113636.367 Hz  
 FIDRES 1.733953 Hz  
 AQ 0.5767168 sec  
 RG 206.72  
 DW 4.400 usec  
 DE 6.50 usec  
 TE 295.2 K  
 D1 1.00000000 sec  
 TD0 1  
 SFO1 470.5453180 MHz  
 NUC1 19F  
 P1 15.00 usec  
 PLW1 47.23500061 W

F2 - Processing parameters  
 SI 65536  
 SF 470.5923772 MHz  
 WDW EM  
 SSB 0  
 LB 0.30 Hz  
 GB 0  
 PC 1.00

Figure S8. <sup>19</sup>F{<sup>1</sup>H} NMR spectrum of compound 2 in CD<sub>2</sub>Cl<sub>2</sub>.

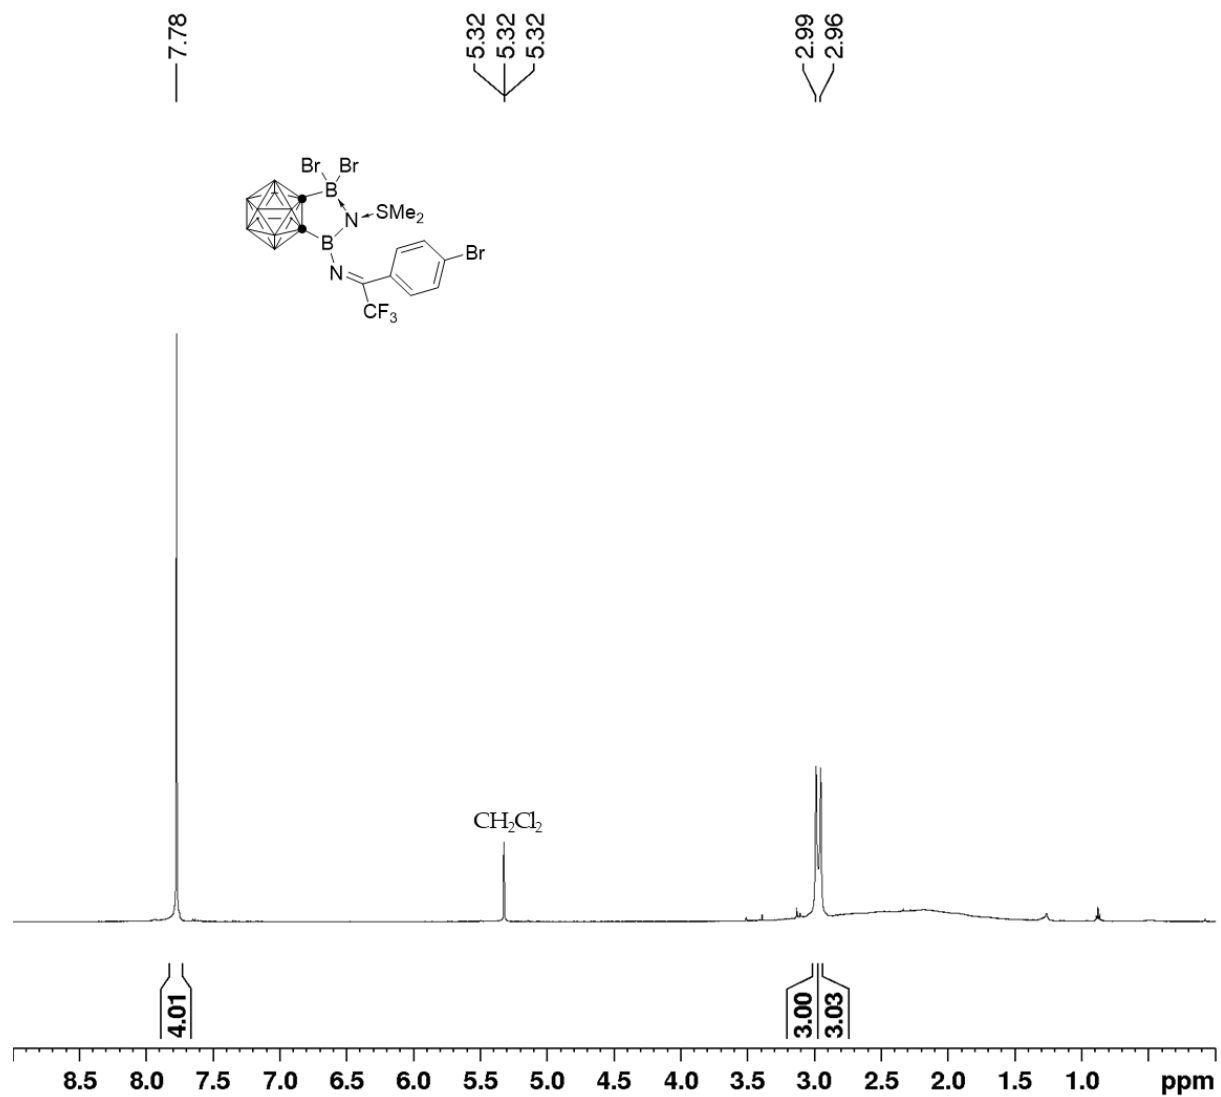

Figure S9. <sup>1</sup>H NMR spectrum of compound 3 in CD<sub>2</sub>Cl<sub>2</sub>.

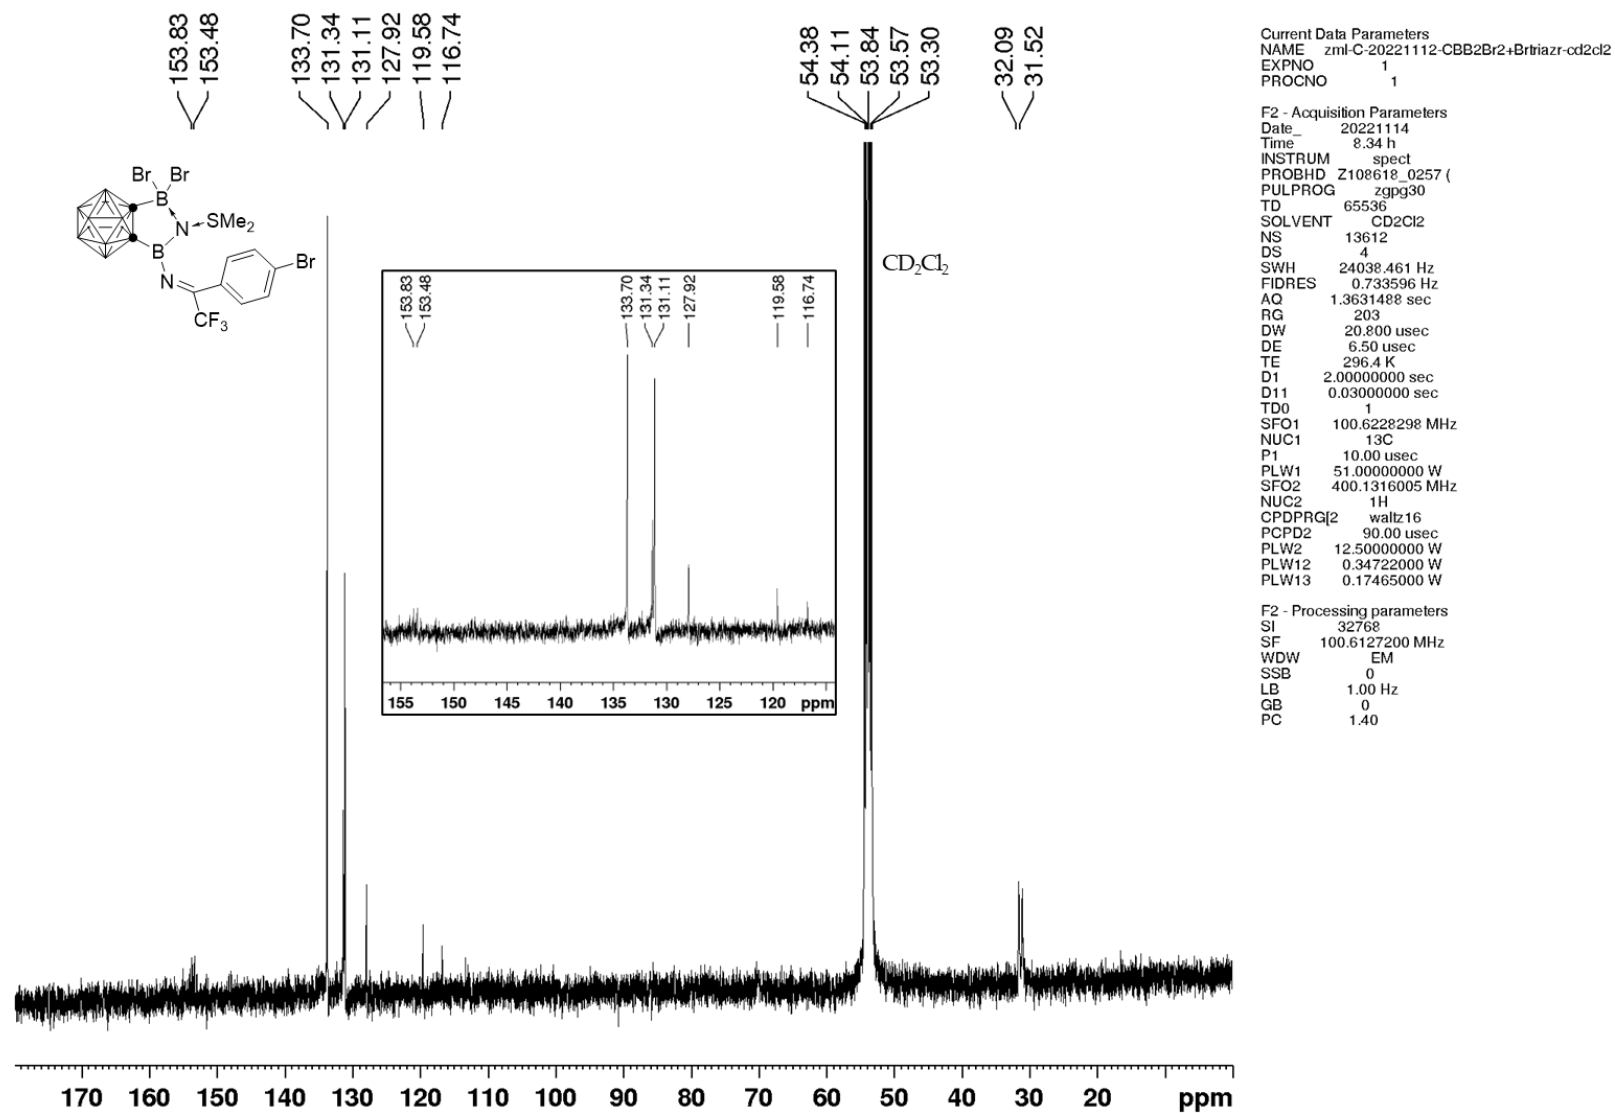

Figure S10.  $^{13}\text{C}\{^1\text{H}\}$  NMR spectrum of compound **3** in  $\text{CD}_2\text{Cl}_2$ .

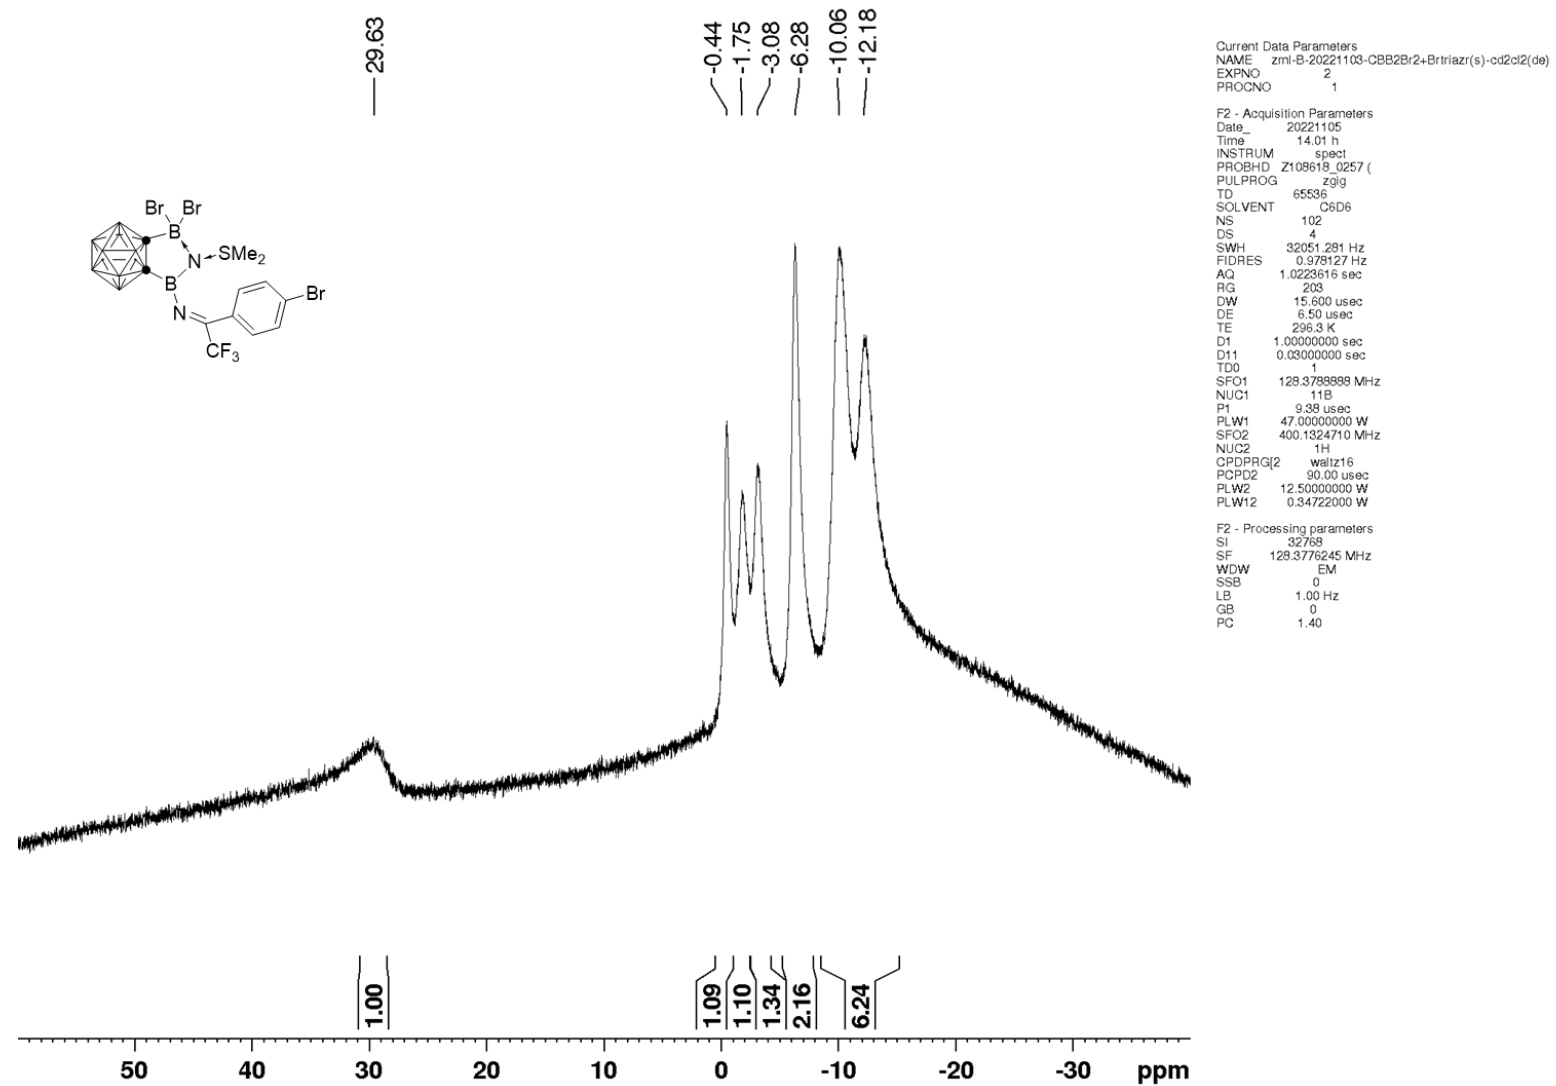

Figure S11.  $^{11}\text{B}\{^1\text{H}\}$  NMR spectrum of compound 3 in  $\text{CD}_2\text{Cl}_2$ .



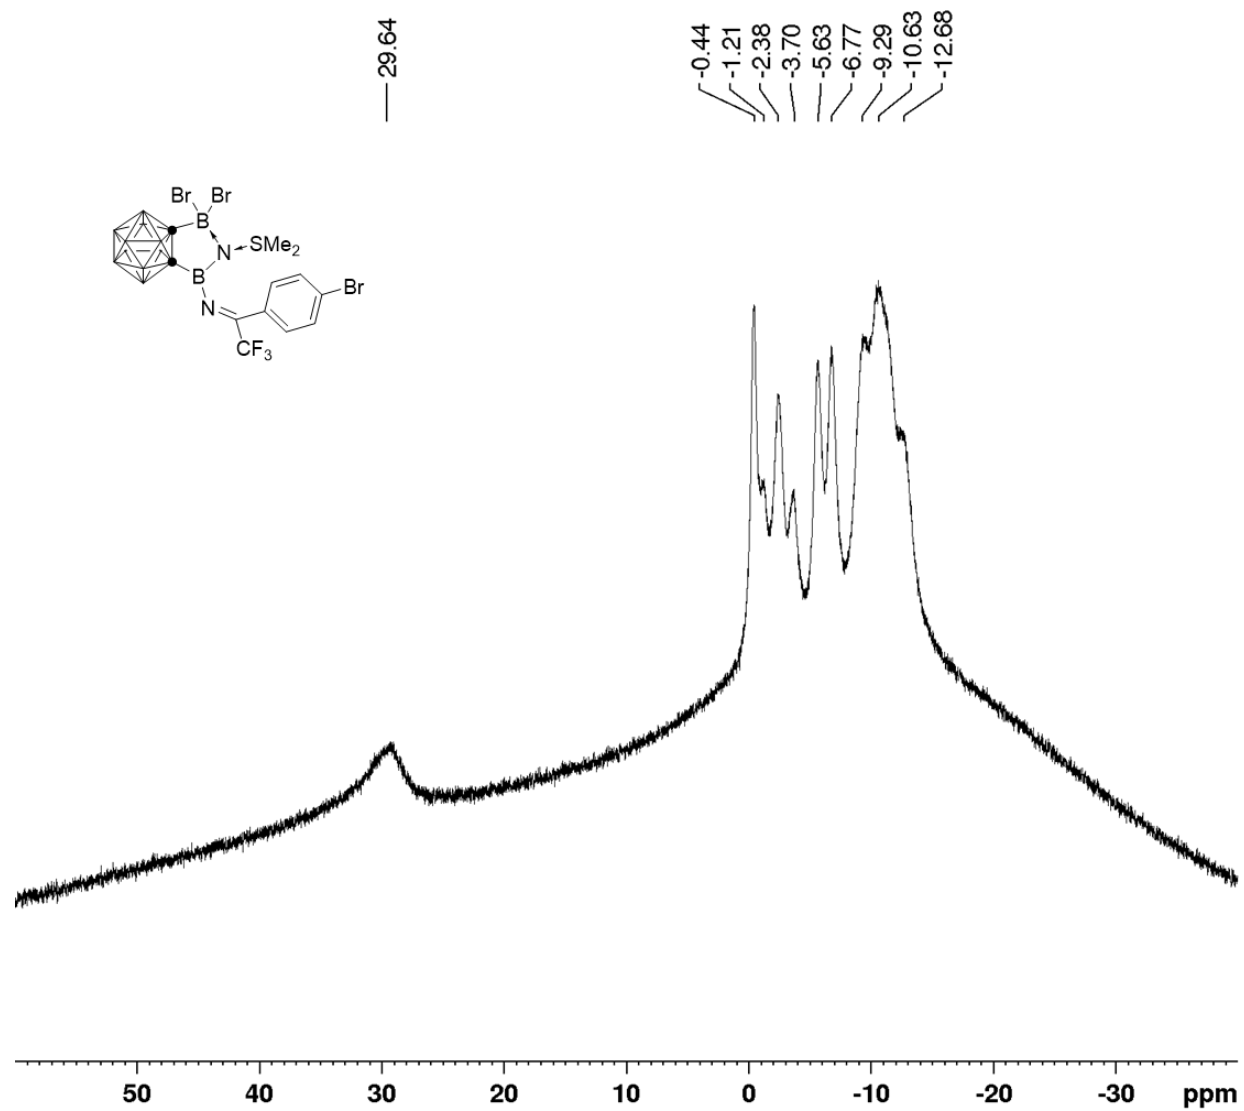

Current Data Parameters  
 NAME zml-B-20221103-CBB2Br2+Brtriazr(s)-cd2cl2(co)  
 EXPNO 2  
 PROCNO 1

F2 - Acquisition Parameters  
 Date\_ 20221105  
 Time 14.06 h  
 INSTRUM spect  
 PROBHD Z109619\_0257 ( )  
 PULPROG zg  
 TD 65536  
 SOLVENT C6D6  
 NS 136  
 DS 4  
 SWH 32051.291 Hz  
 FIDRES 0.978127 Hz  
 AQ 1.0223616 sec  
 RG 203  
 DW 15.600 usec  
 DE 6.50 usec  
 TE 295.9 K  
 D1 1.0000000 sec  
 TD0 1  
 SFO1 128.378898 MHz  
 NUC1 11B  
 P1 9.98 usec  
 PLW1 47.0000000 W

F2 - Processing parameters  
 SI 32768  
 SF 128.3776233 MHz  
 WDW EM  
 SSB 0  
 LB 1.00 Hz  
 GB 0  
 PC 1.40

Figure S12.  $^{11}\text{B}$  NMR spectrum of compound **3** in  $\text{CD}_2\text{Cl}_2$ .

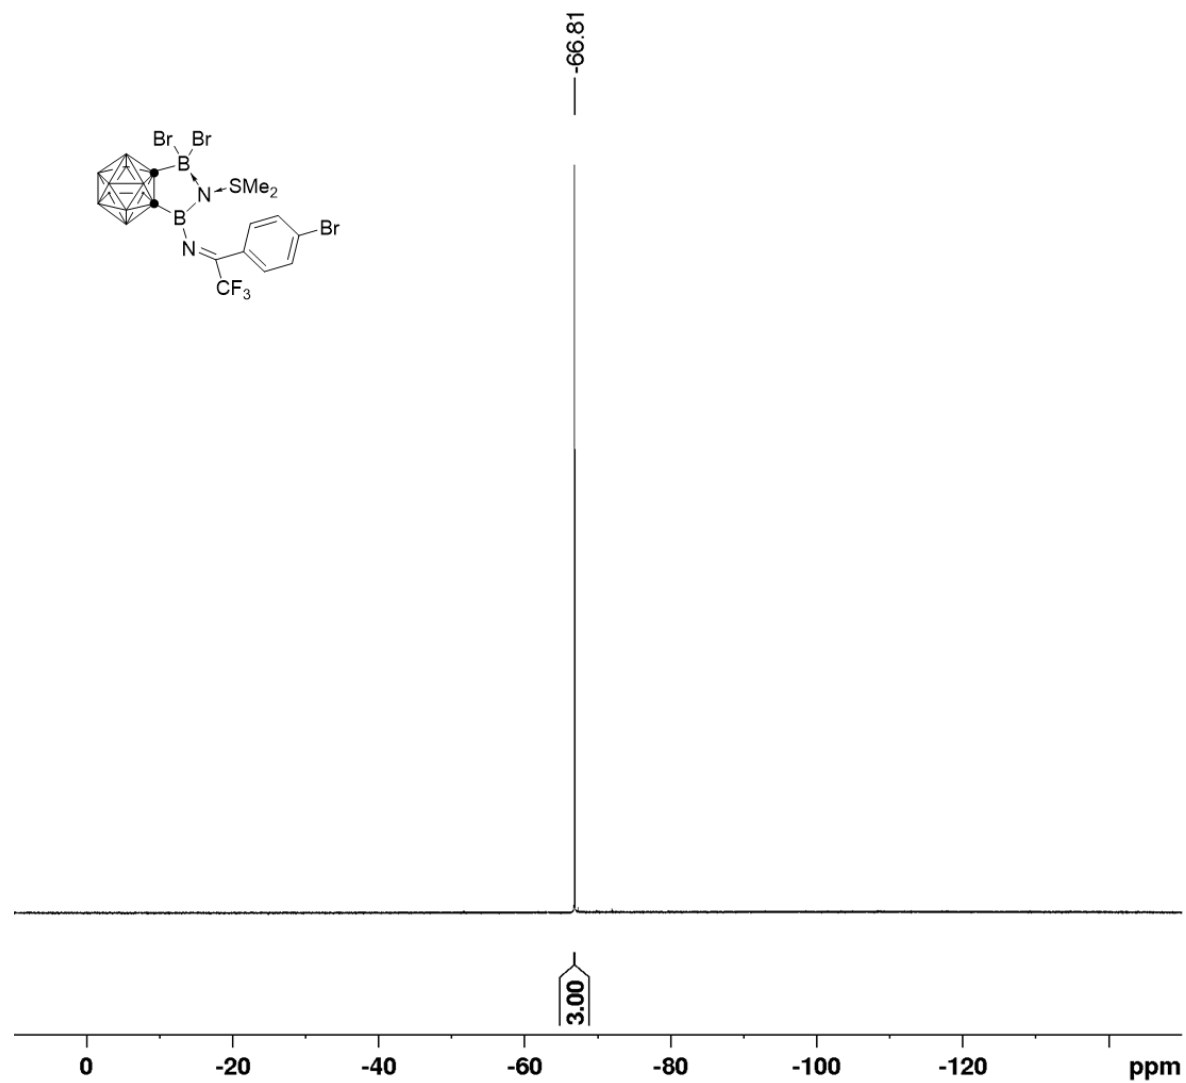

Current Data Parameters  
 NAME zml-F-20221112-CBB2Br2+Brtriazr-cd2cl2  
 EXPNO 1  
 PROCNO 1

F2 - Acquisition Parameters  
 Date\_ 20221112  
 Time 13.42 h  
 INSTRUM spect  
 PROBHD Z119470\_0283 (  
 PULPROG zgpg30  
 TD 131072  
 SOLVENT CD2Cl2  
 NS 16  
 DS 4  
 SWH 113636.367 Hz  
 FIDRES 1.733953 Hz  
 AQ 0.5767168 sec  
 RG 206.72  
 DW 4.400 usec  
 DE 6.50 usec  
 TE 295.1 K  
 D1 1.00000000 sec  
 TD0 1  
 SFO1 470.5453180 MHz  
 NU1 19F  
 P1 15.00 usec  
 PLW1 47.23500061 W

F2 - Processing parameters  
 SI 65536  
 SF 470.5923772 MHz  
 WDW EM  
 SSB 0  
 LB 0.30 Hz  
 GB 0  
 PC 1.00

Figure S13. <sup>19</sup>F{<sup>1</sup>H} NMR spectrum of compound 3 in CD<sub>2</sub>Cl<sub>2</sub>.

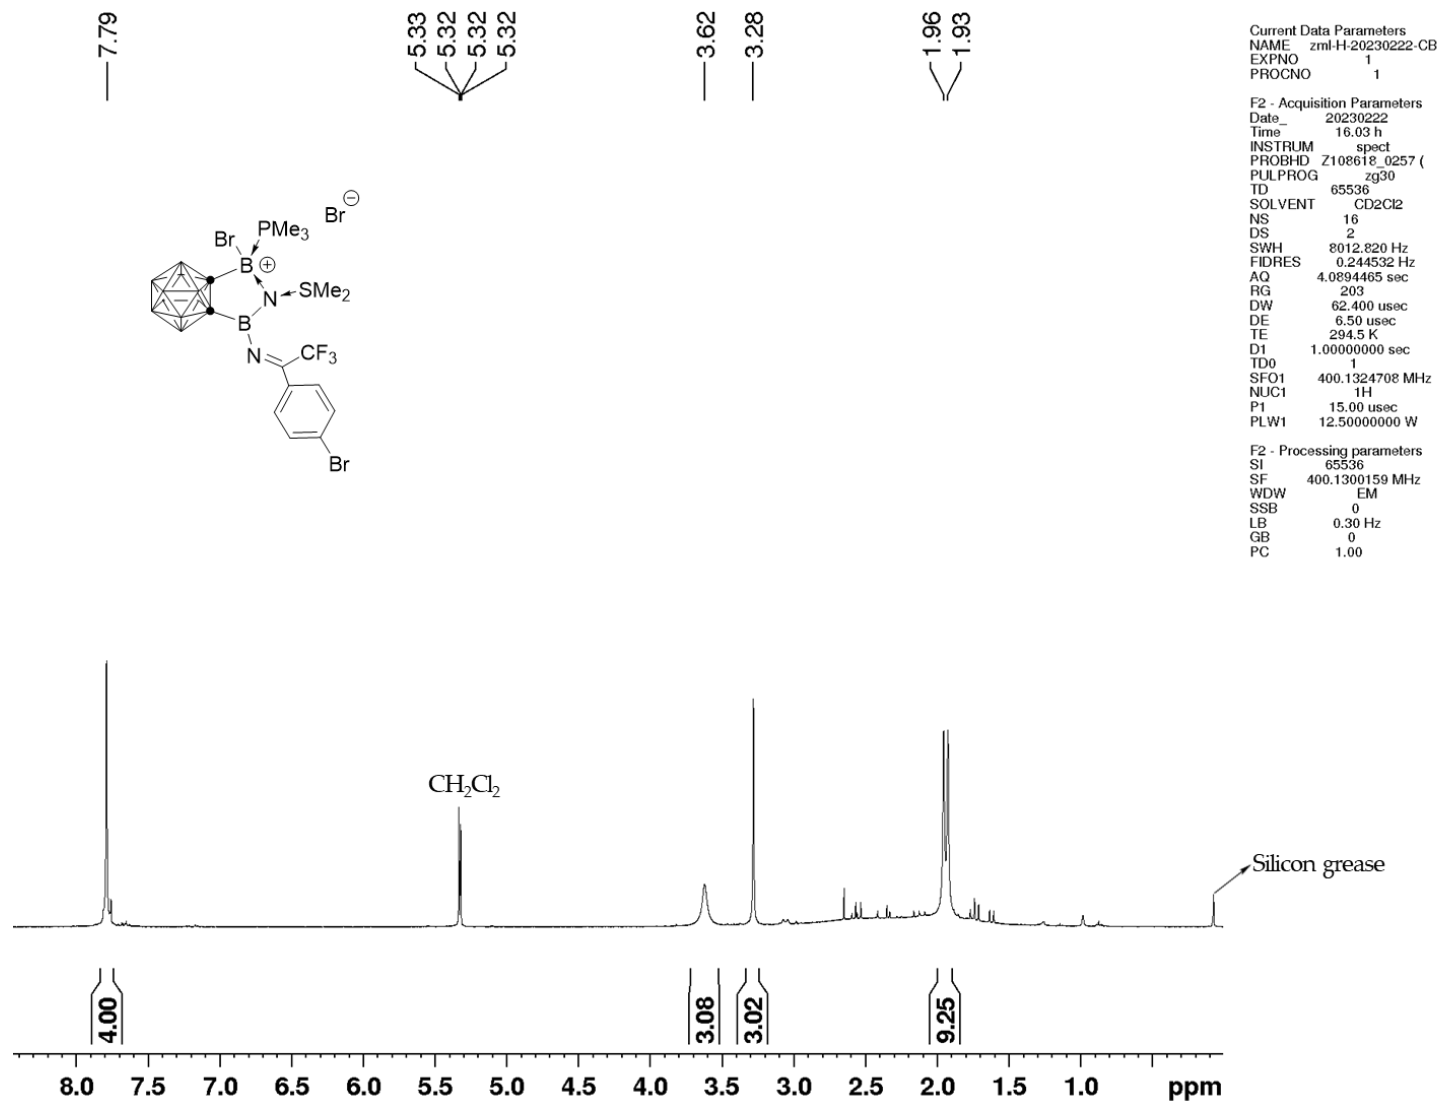

Figure S14. <sup>1</sup>H NMR spectrum of compound 4 in CD<sub>2</sub>Cl<sub>2</sub>.

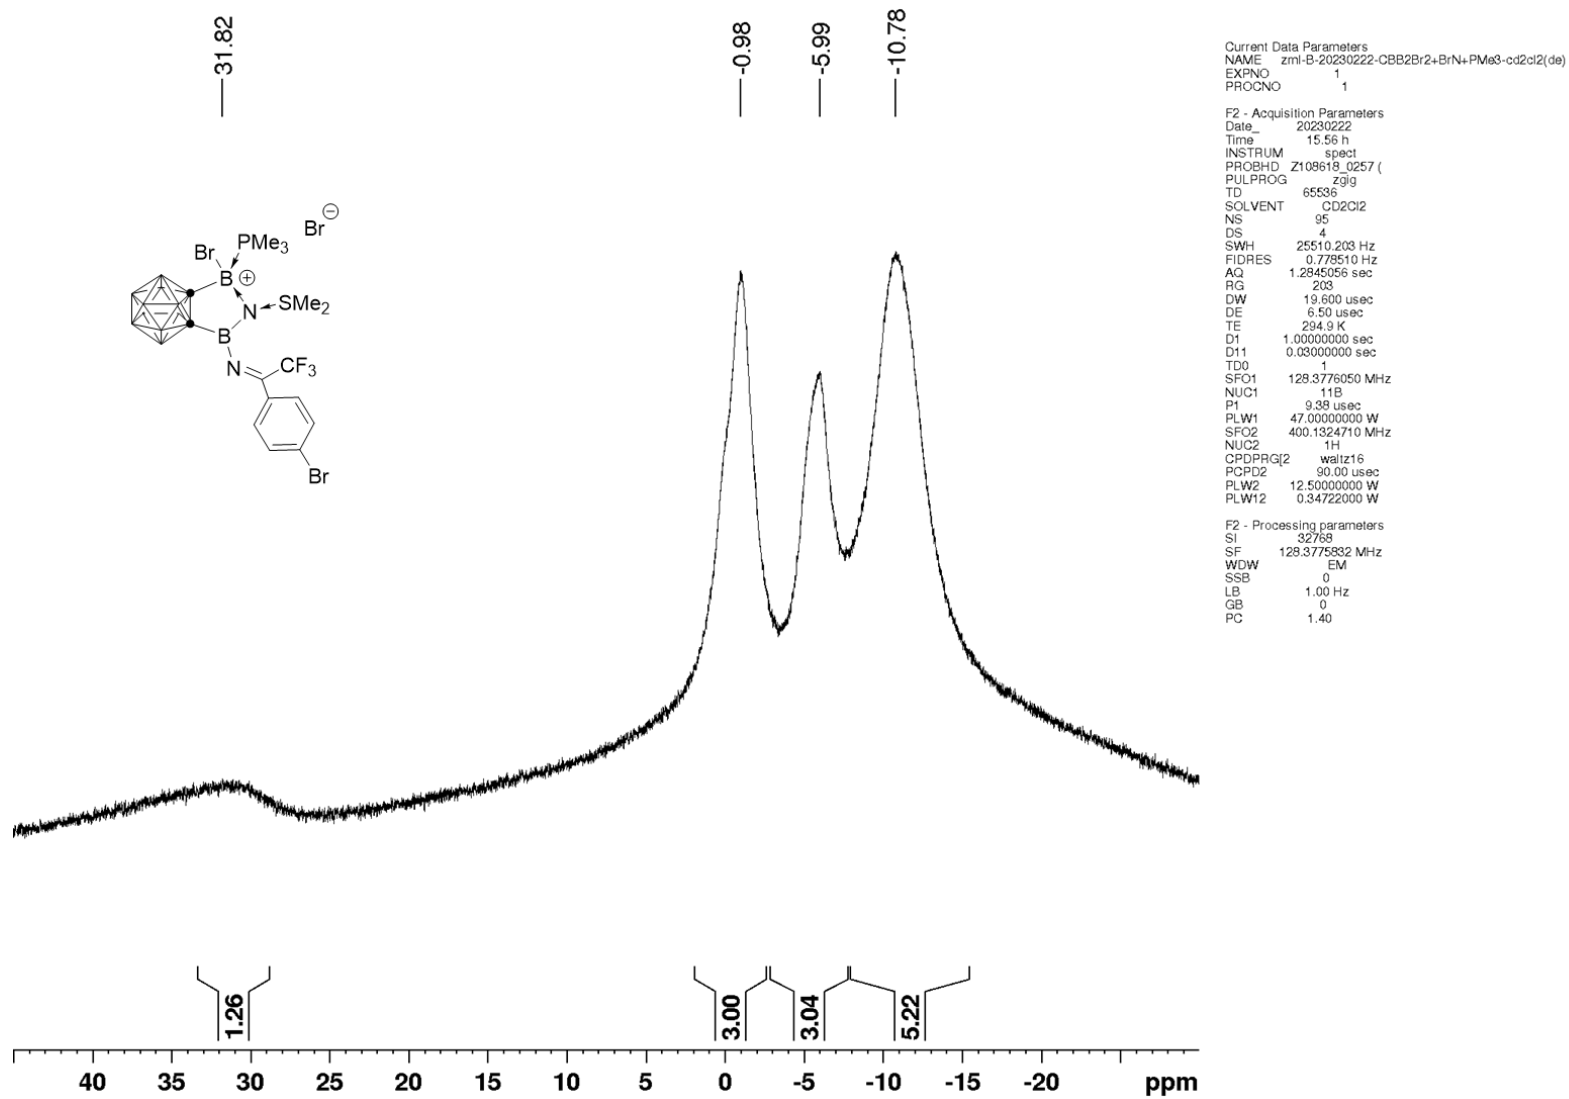

Figure S15. <sup>11</sup>B{<sup>1</sup>H} NMR spectrum of compound 4 in CD<sub>2</sub>Cl<sub>2</sub>.

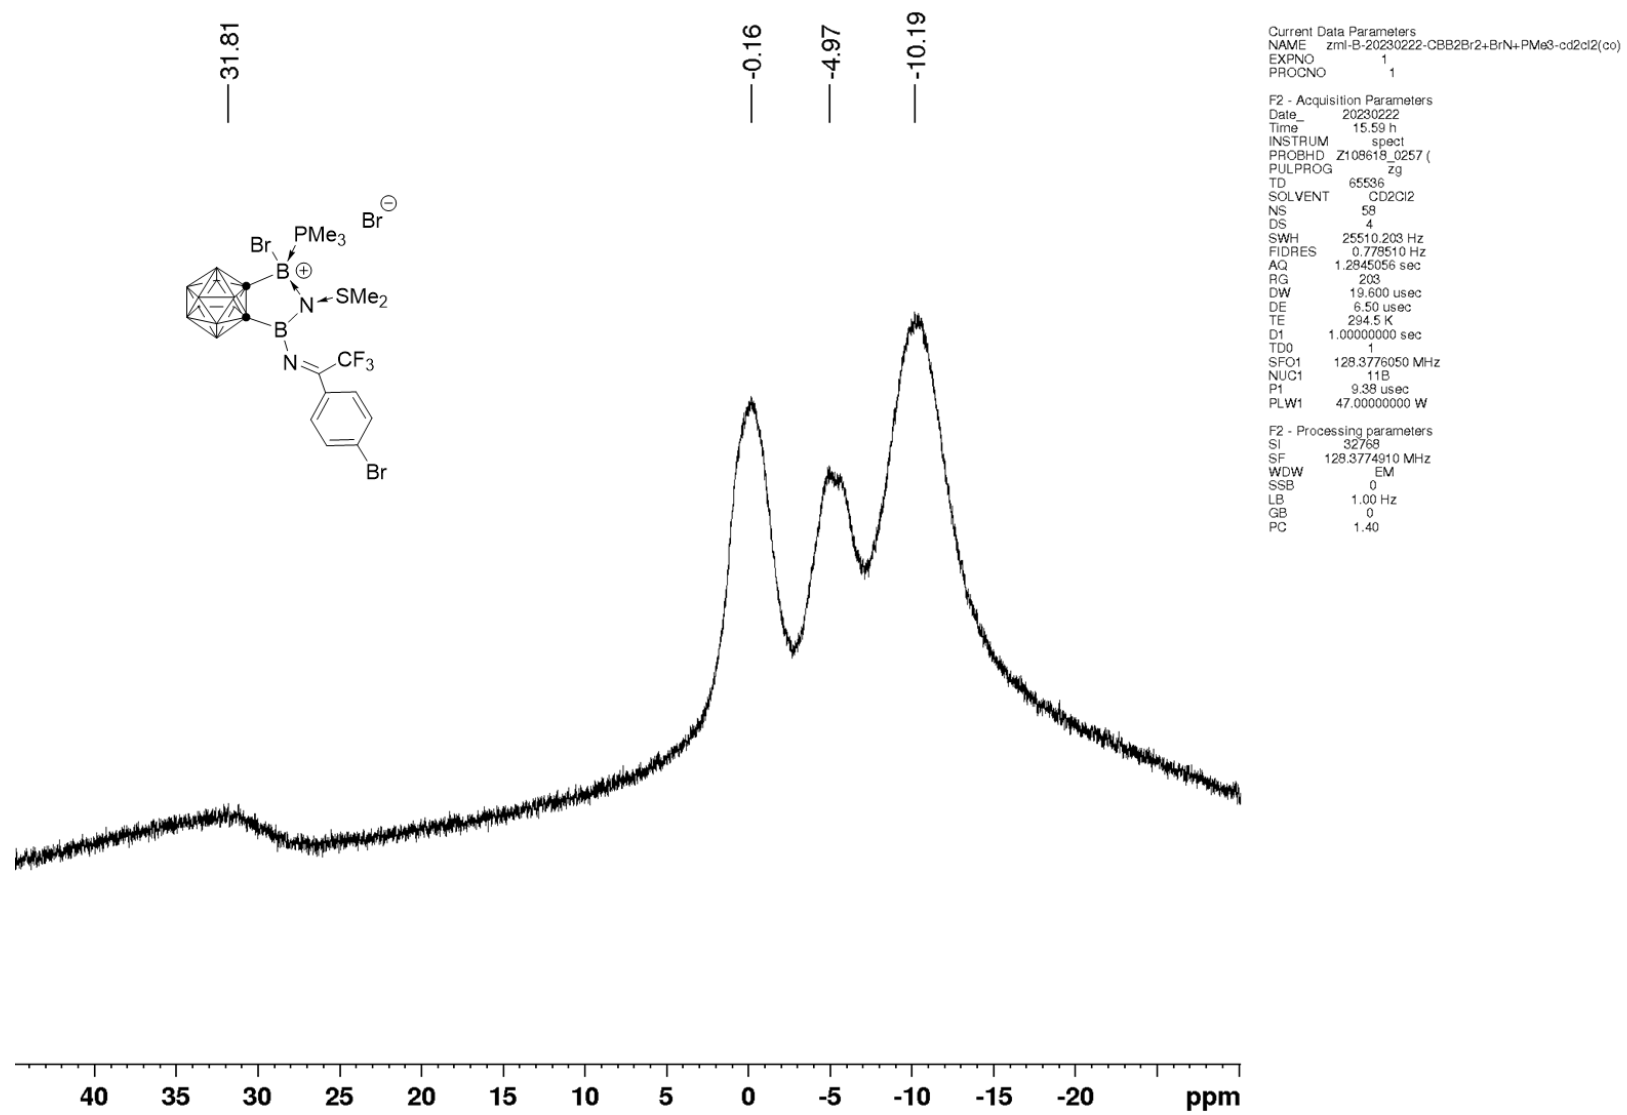

Figure S16.  $^{11}\text{B}\{^1\text{H}\}$  NMR spectrum of compound **4** in  $\text{CD}_2\text{Cl}_2$ .

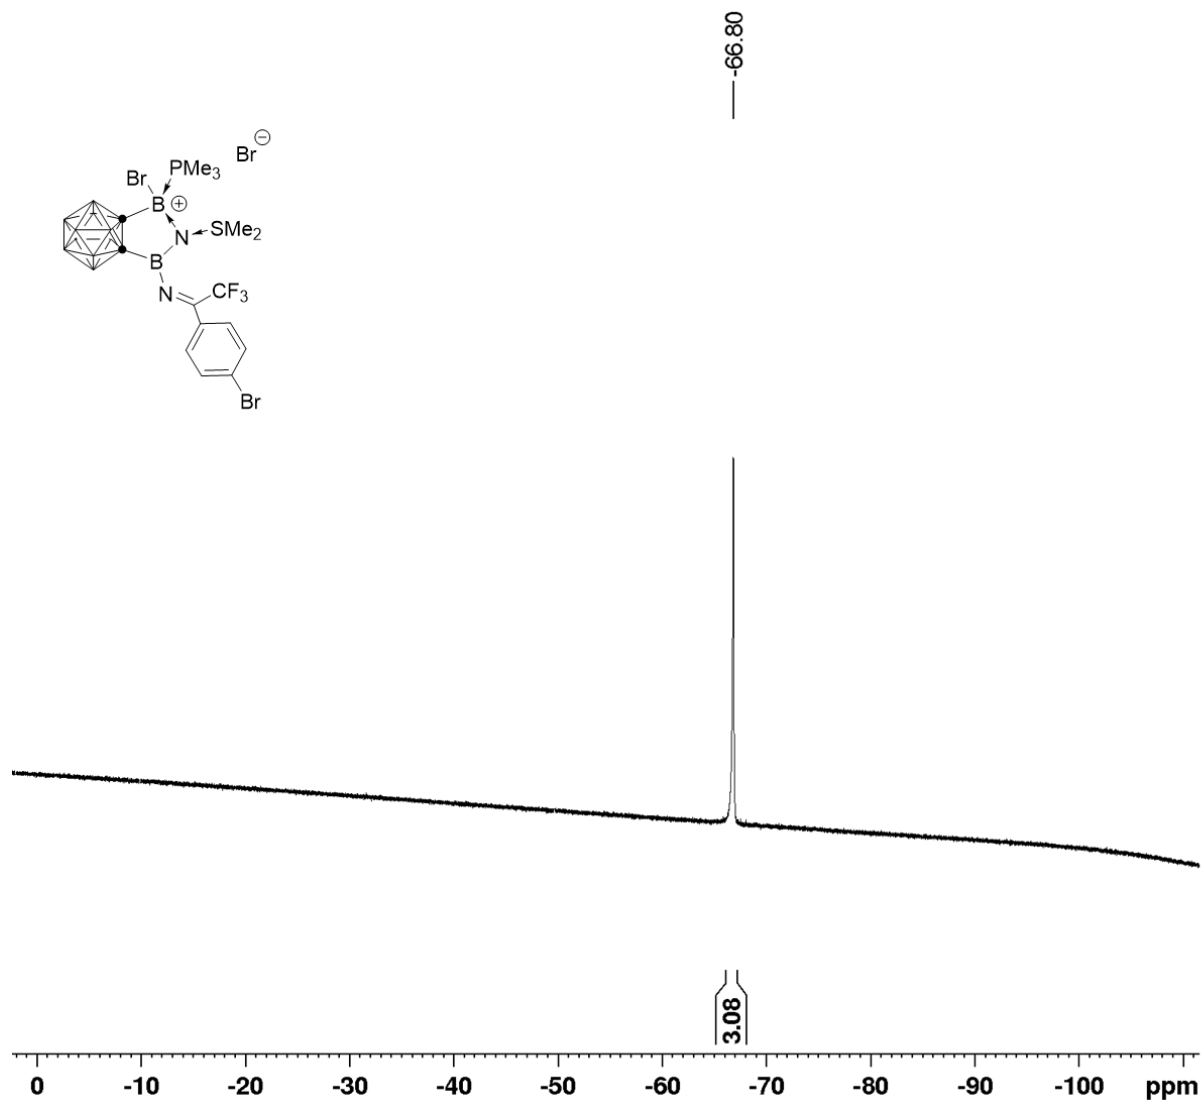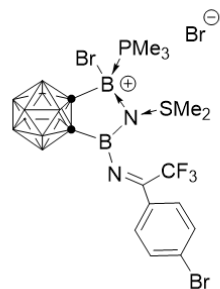

Current Data Parameters  
 NAME zml-F-20230321-BrN+PMe3-cd2cl2  
 EXPNO 1  
 PROCNO 1

F2 - Acquisition Parameters  
 Date\_ 20230321  
 Time 10.31 h  
 INSTRUM spect  
 PROBHD Z149001\_0010 ( )  
 PULPROG zgpg30  
 TD 131072  
 SOLVENT None  
 NS 16  
 DS 4  
 SWH 113636.367 Hz  
 FIDRES 1.733953 Hz  
 AQ 0.5767168 sec  
 RG 8.25  
 DW 4.400 usec  
 DE 18.00 usec  
 TE 296.2 K  
 D1 1.00000000 sec  
 TD0 1  
 SFO1 470.5453180 MHz  
 NUC1 19F  
 P1 15.00 usec  
 PLW1 14.82900047 W

F2 - Processing parameters  
 SI 65536  
 SF 470.5923772 MHz  
 WDW EM  
 SSB 0  
 LB 0.30 Hz  
 GB 0  
 PC 1.00

Figure S17.  $^{19}\text{F}\{^1\text{H}\}$  NMR spectrum of compound 4 in  $\text{CD}_2\text{Cl}_2$ .

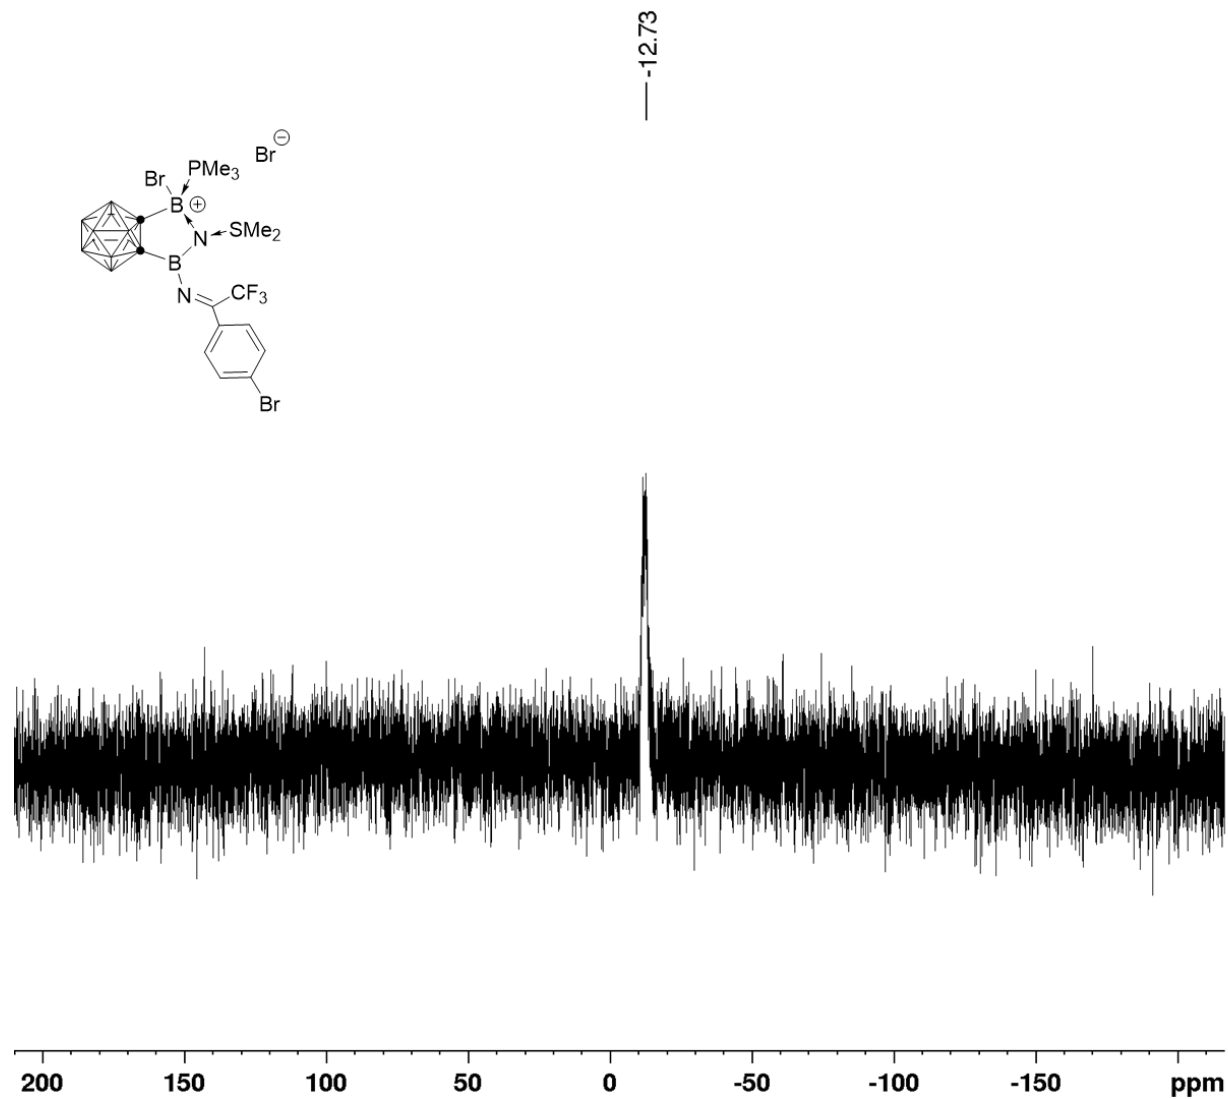

Current Data Parameters  
 NAME zml-P-20230320-BrN+PMe3-cd2cl2  
 EXPNO 1  
 PROCNO 1

F2 - Acquisition Parameters  
 Date\_ 20230320  
 Time\_ 11.13 h  
 INSTRUM spect  
 PROBHD Z108618\_0257 ( )  
 PULPROG zg30  
 TD 65536  
 SOLVENT CD2Cl2  
 NS 210  
 DS 4  
 SWH 163043.484 Hz  
 FIDRES 4.975692 Hz  
 AQ 0.2009771 sec  
 RG 203  
 DW 3.067 usec  
 DE 6.50 usec  
 TE 295.7 K  
 D1 2.00000000 sec  
 TD0 1  
 SFO1 161.9674942 MHz  
 NUC1 31P  
 P1 15.00 usec  
 PLW1 12.00000000 W

F2 - Processing parameters  
 SI 32768  
 SF 161.9754949 MHz  
 WDW EM  
 SSB 0  
 LB 1.00 Hz  
 GB 0  
 PC 1.40

Figure S18.  $^{31}\text{P}$  NMR spectrum of compound **4** in  $\text{CD}_2\text{Cl}_2$ .

## References

1. M. Zhong, J. Zhang, Z. Lu, Z. Xie, *Dalton Transactions*, 2021, **50**, 17150-17155.
2. G. M. Sheldrick, SADABS: Program for Empirical Absorption Correction of Area Detector Data. University of Göttingen: Germany, 1996.
3. G. M. Sheldrick, SHELXTL 5.10 for Windows NT: Structure Determination Software Programs. Bruker Analytical X-ray Systems, Inc., Madison, Wisconsin, USA, 1997.
4. M. J. Frisch, G. W. Trucks, H. B. Schlegel, G. E. Scuseria, M. A. Robb, J. R. Cheeseman, G. Scalmani, V. Barone, G. A. Petersson, H. Nakatsuji, X. Li, M. Caricato, A. V. Marenich, J. Bloino, B. G. Janesko, R. Gomperts, B. Mennucci, H. P. Hratchian, J. V. Ortiz, A. F. Izmaylov, J. L. Sonnenberg, D. Williams-Young, F. Ding, F. Lipparini, F. Egidi, J. Goings, B. Peng, A. Petrone, T. Henderson, D. Ranasinghe, V. G. Zakrzewski, J. Gao, N. Rega, G. Zheng, W. Liang, M. Hada, M. Ehara, K. Toyota, R. Fukuda, J. Hasegawa, M. Ishida, T. Nakajima, Y. Honda, O. Kitao, H. Nakai, T. Vreven, K. Throssell, J. A. Montgomery, Jr., J. E. Peralta, F. Ogliaro, M. J. Bearpark, J. J. Heyd, E. N. Brothers, K. N. Kudin, V. N. Staroverov, T. A. Keith, R. Kobayashi, J. Normand, K. Raghavachari, A. P. Rendell, J. C. Burant, S. S. Iyengar, J. Tomasi, M. Cossi, J. M. Millam, M. Klene, C. Adamo, R. Cammi, J. W. Ochterski, R. L. Martin, K. Morokuma, O. Farkas, J. B. Foresman, and D. J. Fox, Gaussian, Inc., Wallingford CT, 2019.
5. Zhao, Y.; Truhlar, D. G., *Theor. Chem. Acc.* 2008, **120**, 215-241.
6. S. Grimme, J. Antony, S. Ehrlich and H. Krieg, *J. Chem. Phys.*, 2010, **132**, 154104.
7. S. Grimme, *J. Comput. Chem.* 2006, **27**, 1787-1799.
8. K. Fukui, *J. Phys. Chem.*, 1970, **74**, 4161-4163.
9. K. Fukui, *Acc. Chem. Res.*, 1981, **14**, 363-368.
10. M. Cossi, N. Rega, G. Scalmani and V. Barone, *J. Comput. Chem.*, 2003, **24**, 669-681.
11. M. Cossi, V. Barone, R. Cammi and J. Tomasi, *Chem. Phys. Lett.*, 1996, **255**, 327-335.
12. M. Cossi, V. Barone, B. Mennucci and J. Tomasi, *Chem. Phys. Lett.*, 1988, **286**, 253-260.
13. M. Cossi, V. Barone and M. A. Robb, *J. Chem. Phys.* 1999, **111**, 5295-5302.
14. A. E. Reed, L. A. Curtiss and F. Weinhold, *Chem. Rev.*, 1988, **88**, 899-926.
15. A. D. Becke, *J. Chem. Phys.*, 1993, **98**, 5648-5652.
16. C. Lee, W. Yang and R. G. Parr, *Phys. Rev. B*, 1988, **37**, 785-789.
